1 **TITLE**

2 Interactions between the N- and C- termini of mechanosensitive ion channel *AtrMSL10* are  
3 consistent with a three-step mechanism for activation

4  
5 **AUTHORS/AFFILIATIONS**

6 Debarati Basu, Jennette M. Shoots, and Elizabeth S. Haswell\*  
7 NSF Center for Engineering Mechanobiology, Dept. of Biology, Washington University in St.  
8 Louis, St. Louis MO 63130

9  
10 **CONTACT INFORMATION**

11 [debaratibasuwustl.edu](mailto:debaratibasuwustl.edu)

12 [jshoots@wustl.edu](mailto:jshoots@wustl.edu)

13 \*[ehaswell@wustl.edu](mailto:ehaswell@wustl.edu), +1 314 935-9223

14  
15 **RUNNING TITLE**

16 Interaction between the N- and C-termini of MSL10

17  
18 DATE SUBMITTED: February 19, 2020

19 WORD COUNT: 5537

20 6 FIGURES

21 6 SUPPLEMENTARY FIGURES

22 1 SUPPLEMENTARY TABLE

23

24

25

26 **HIGHLIGHT**

27 Cell death is triggered by mutations in either the cytoplasmic N- or C-terminus of *AtMSL10*. Our  
28 proposed model explains how membrane tension may activate signaling through the interaction  
29 of these two domains.

30

31 **ABSTRACT**

32 Although a growing number of mechanosensitive ion channels are being identified in plant  
33 systems, the molecular mechanisms by which they function are still under investigation.  
34 Overexpression of the mechanosensitive ion channel MSL (MscS-Like)10 fused to GFP triggers  
35 a number of developmental and cellular phenotypes including the induction of cell death, and  
36 this function is influenced by seven phosphorylation sites in its soluble N-terminus. Here, we  
37 show that these and other phenotypes required neither overexpression nor a tag and could be also  
38 induced by a previously identified point mutation in the soluble C-terminus (S640L). The  
39 promotion of cell death and hyperaccumulation of H<sub>2</sub>O<sub>2</sub> in *35S:MSL10<sup>S640L</sup>-GFP* overexpression  
40 lines was suppressed by N-terminal phosphomimetic substitutions, and the soluble N- and C-  
41 terminal domains of MSL10 physically interacted. We propose a three-step model by which  
42 tension-induced conformational changes in the C-terminus are transmitted to the N-terminus,  
43 leading to its dephosphorylation and the induction of adaptive responses. Taken together, this  
44 work expands our understanding of the molecular mechanisms of mechanotransduction in plants.

45

46 **KEYWORDS**

47 MscS-Like, MSL10, mechanosensitive ion channel, cell death, reactive-oxygen species,  
48 *Arabidopsis thaliana*

49

50 **ABBREVIATIONS**

51 MS, mechanosensitive; MSL, MscS-Like; ROS, reactive oxygen species, GFP, green fluorescent  
52 protein

53

54 **INTRODUCTION**

55 Mechanical forces, whether endogenous or exogenous in origin, are important stimuli that help  
56 direct plant growth, development, and immune responses. External mechanical perturbations  
57 include touch, wounding, wind, vibration, gravity, osmotic stress, and pathogen invasion  
58 (Monshausen and Haswell, 2013; Jayaraman et al., 2014). Endogenous mechanical forces  
59 include turgor pressure, a fundamental cue influencing cell expansion (Hamant and Haswell,  
60 2017; Kierzkowski, 2019). Before plants can coordinate a cellular response to these varied  
61 stimuli, they must be able to precisely sense and transduce mechanical cues.

62

63 Mechanosensitive (MS) ion channels provide a fast and efficient molecular mechanism for  
64 transducing mechanical stimuli into intracellular signals. They are found in all domains of life,  
65 and are highly diverse in terms of their structure, ion selectivity, regulation, and physiological  
66 roles (Martinac et al., 2013; Ranade et al., 2015; Basu and Haswell, 2017). However, all MS ion  
67 channels share two common attributes: opening in response to mechanical force (lateral  
68 membrane tension, forces relayed from the cytoskeleton, or a combination of both) and  
69 facilitating the passive flow of ions across membranes (Bavi et al., 2017).

70

71 In plants, there is a growing list of predicted and established MS ion channel families, which  
72 includes the MscS-Like (MSL, Basu and Haswell, 2017), Two Pore Potassium (TPK, Maathuis,  
73 2011), Mid1-Complementing Activity (MCA, Nakagawa et al., 2007) and Reduced  
74 Hyperosmolality-induced  $[Ca^{2+}]$  Increase (OSCA, (Hou et al., 2014; Yuan et al., 2014; Murthy et  
75 al., 2018) families, as well as homologs of the animal MS ion channel Piezo (Zhang et al.,  
76 2019). Plant MS channels have been implicated in a wide range of physiological functions,  
77 including organellar osmoregulation (Veley et al., 2012), stomatal closure (Gobert et al., 2007;  
78 Yuan et al., 2014), cold tolerance (Mori et al., 2018), hyperosmolarity-evoked  $Ca^{2+}$  influx (Yuan  
79 et al., 2014), penetration of hard substrates (Nakagawa et al., 2007), pathogen-triggered  
80 immunity (Zhang et al., 2017) and viral resistance (Zhang et al., 2019). However, the detailed  
81 molecular mechanisms by which MS channels participate in these events need further  
82 investigation.

83

84 The MSL family of MS ion channels was first identified based on homology to the canonical MS  
85 ion channel from *Escherichia coli*, Mechanosensitive ion channel of Small conductance  
86 (*EcMscS*) (Pivetti et al., 2003; Haswell and Meyerowitz, 2006; Haswell et al., 2008). There are  
87 ten MSLs encoded in the *Arabidopsis thaliana* genome, and they are localized to mitochondria  
88 (MSL1, Lee et al., 2016), to chloroplasts (MSL2/3, Haswell and Meyerowitz, 2006) or to the  
89 plasma membrane (MSL8, MSL9 and MSL10, Haswell et al., 2008; Hamilton et al., 2015). The  
90 tension-gated ion flux of MSL1, MSL8, and MSL10 have been examined by single channel  
91 patch-clamp electrophysiology (Maksaev and Haswell, 2012; Hamilton et al., 2015; Lee et al.,  
92 2016). MSL2/MSL3 and MSL8 are thought to serve as osmotic safety valves in plastids and in  
93 pollen, respectively (Veley et al., 2012; Hamilton et al., 2015). MSL1 plays a poorly understood  
94 role maintaining redox homeostasis in mitochondria (Lee et al., 2016).

95  
96 While MSL10 was the first in the family to be characterized by electrophysiology, its  
97 physiological function is still under study. To date, no visible loss-of function phenotypes have  
98 been reported in *msl10-1* null mutants (nor in double *msl9-1 msl10-1* mutants, where MSL10's  
99 closest homolog MSL9 is also ablated). Overexpression of *MSL10-GFP* results in growth  
100 retardation, ectopic cell death, constitutive production of H<sub>2</sub>O<sub>2</sub>, and induction of genes involved  
101 in ROS accumulation, senescence, and abiotic and biotic stress responses (Veley et al., 2014).  
102 These gain-of-function phenotypes can be attributed to a single domain of MSL10, the soluble  
103 N-terminus; in a transient *Nicotiana benthamiana* expression system, this domain can induce cell  
104 death on its own (Veley et al., 2014). In another study, we showed that variants of MSL10-GFP  
105 harboring pore-blocking lesions also induce cell death in this system (Maksaev et al., 2018).  
106 None of the phenotypes associated with *MSL10-GFP* overexpression are observed in plants  
107 overexpressing a version of *MSL10-GFP* harboring four phospho-mimetic substitutions in the N-  
108 terminus (*MSL10*<sup>S57D, S128D, S131E, T136D</sup>-GFP, or *MSL10*<sup>4D</sup>-GFP), though this variant has MS ion  
109 channel activity, protein levels, and subcellular localization indistinguishable from the wild type  
110 (Veley et al., 2014).

111  
112 Thus, dephosphorylation of the MSL10 N-terminus activates *MSL10-GFP* to trigger cell death  
113 when overexpressed in *Arabidopsis* or in *N. benthamiana*. Ion flux through the channel pore,  
114 however, is not required. We infer that under normal conditions, MSL10 remains in its inactive



115 state (i.e. with a phosphorylated N-terminus), and that overexpression overwhelms the kinase  
116 that normally maintains it in its inactive form, thereby triggering a cell death signaling cascade.  
117 It has been shown that the opening of *EcMscS* is accompanied by structural rearrangement of the  
118 soluble C-terminal domain (Bass et al., 2002; Wang et al., 2008; Machiyama et al., 2009; Rowe  
119 et al., 2014). If similar tension-induced rearrangements of the C-terminus occur in MSL10, they  
120 might be conveyed to the N-terminus, and thereby lead to active signaling.

121  
122 Indeed, a functional link between the N- and the C-termini of MSL10 was suggested by a recent  
123 report by the Zhou group (Zou et al., 2015). The *real* (*RAP2.6 expresser in shoot apex*) mutant  
124 harbors an EMS-induced point mutation (S640L) located in the soluble C-terminus of *MSL10*  
125 that leads to increased expression of a wound-responsive luciferase reporter gene. Mutant *real*  
126 plants exhibit growth retardation and ectopic cell death, reminiscent of *MSL10-GFP*  
127 overexpression lines. The *real* mutants also exhibited shorter petioles, accumulation of  
128 anthocyanin pigments, lack of apical dominance, wound-induced hyperaccumulation of JA, and  
129 altered expression of genes involved in JA biosynthesis and response (*LIPOXYGENASE2* or  
130 *LOX2*, *PLANT DEFENSIN* or *PDF1.2*, and *ALLENE OXIDASE* or *AOS*).

131  
132 The *real* mutant thus provides the opportunity to probe MSL10 function in an endogenous  
133 context. Its phenotypic similarity to *MSL10-GFP* overexpression lines suggested that growth  
134 retardation, ROS accumulation, and cell death might reflect physiological functions of the  
135 MSL10 protein, though it was also possible that these similarities might be only superficial, or  
136 that the presence of certain C-terminal tags might produce altered transgene function (Zou et al.,  
137 2015). As a result, we made an in-depth comparison of the developmental, cellular and gene  
138 expression phenotypes resulting from *MSL10-GFP* overexpression, the *real* lesion, and genomic  
139 phospho-variants of *MSL10*. The results from these experiments, indicating similar phenotypes  
140 among all these gain-of-function alleles, prompted us to assess genetic and physical interactions  
141 between the soluble N- and C- termini of MSL10. Our results are consistent with a three-step  
142 process of MSL10 activation that transduces the effect of increased membrane tension from the  
143 soluble C-terminus to the N-terminus of the channel, leading to phosphorylation and  
144 subsequently triggering downstream signaling and eventual cell death.

145



## 147 **METHODS**

148

### 149 **Sequence alignments**

150 The full-length amino acid sequence of *Arabidopsis thaliana* MSL10 was used as a BLASTp  
151 query to search for homologs in selected plant species. The protein with the highest identity to  
152 AtMSL10 in each species was chosen for the final alignment, using the PRALINE multiple  
153 sequence alignment server (Bawono et al., 2017).

154

### 155 **Plant lines and growth conditions**

156 The plants used in this study are all in the *Arabidopsis Col-0* ecotype background. The T-DNA  
157 insertion lines, including *mssl10-1* (SALK\_114626) and *mssl9-1* (SALK\_114361) was obtained  
158 from the Arabidopsis Biological Resource Center (Haswell et al., 2008). The *real/mssl10-3G*  
159 mutant was obtained from the J.-M. Zhou lab (ShanghaiTech University, Shanghai). In most  
160 experiments, plants were grown on soil at 21°C under a 24-h light regime ( $\sim 120 \mu\text{mol m}^{-2}\text{s}^{-1}$ ).  
161 Backcrosses and outcrosses were made through standard techniques and genotyped with PCR-  
162 based markers. The *MSL10-GFP* overexpression lines are described in an earlier study (Veley et  
163 al., 2014).

164

### 165 **Genotyping**

166 DNA was extracted by grinding tissue in extraction buffer (200 mM Tris-HCl pH 7.5, 250 mM  
167 NaCl, 250 mM EDTA, 0.5% SDS) and precipitating with an equal volume of isopropanol. The  
168 *mssl10-3G/real* allele was genotyped by amplifying the genomic region surrounding the point  
169 mutation using gene specific oligos listed in **Supplemental Table 1** followed by digestion with  
170 *TaqI* restriction enzyme (NEB), which only digests the wild-type *MSL10* gene. PCR  
171 genotyping of *mssl10-1* and *mssl9-1* alleles was performed as described (Haswell et al., 2008).

172

### 173 **Cloning and generation of transgenic plants**

174 *MSL10*<sup>S640L</sup> cDNA constructs were generated through site-directed mutagenesis as described  
175 (Jensen and Haswell, 2012) using pENTRY clones (pENTR+*MSL10* and pENTR+*MSL10*<sup>7D</sup>) as  
176 template (Veley et al., 2014). They were cloned into pEarleyGate103 destination vectors (Earley  
177 et al., 2006) using LR recombination. To construct *gMSL10* plasmids, the *MSL10* gene was

178 amplified from genomic wild-type *Col-0* DNA using gene-specific primers listed in **Table S1**  
179 and cloned into pENTR/D-TOPO entry vector (Thermo Fisher Scientific), then recombined into  
180 pBGW destination vectors (Karimi et al., 2002) by LR recombination. The *MSL10g*<sup>7A</sup> and  
181 *MSL10g*<sup>7D</sup> constructs were generated in a single reaction using a two-fragment Gibson  
182 Assembly, using Gibson Assembly NEB Mix and overlapping primers following manufacturer's  
183 recommendation (Thermo Fisher Scientific). The assembled plasmids were then recombined into  
184 pBGW destination vectors by LR recombination. All primers used for Gibson cloning are listed  
185 in **Table S1**. For generating constructs for conditional expression of *MSL10* and its phospho-  
186 variants (*MSL10*<sup>4A</sup> and *MSL10*<sup>4D</sup>) under the dexamethasone (DEX)- inducible promoter, the  
187 Gateway cassette-containing region from pEarleyGate100 (Earley et al., 2006), was amplified  
188 from the plasmid introduced into the binary expression vector pTA7002 (Aoyama and Chua,  
189 1997) using XhoI and SpeI restriction sites. pENTR constructs containing coding region of  
190 *MSL10*, *MSL10*<sup>4A</sup> and *MSL10*<sup>4D</sup> (Veley et al., 2014) were used in recombination reactions with  
191 the pTA7002 vector using LR Clonase.

192

### 193 **Plant transformation**

194 All binary constructs were introduced into wild-type *Col-0*, *mssl10-1* or *mssl9-1*; *mssl10-1* plants  
195 with *Agrobacterium tumefaciens* GV3101 by floral dip (Clough and Bent, 1998). Homozygous  
196 T3 or T4 lines with a single transgene insertion were identified using selectable markers, PCR  
197 genotyping, RT-PCR, and/or fluorescent GFP expression and immunodetection.

198

### 199 **Gene expression analysis**

200 Quantitative reverse-transcription polymerase chain reaction (qRT-PCR) was performed as  
201 described (Hamilton et al., 2015) with minor modifications. Total RNA was isolated from the  
202 rosette leaves of healthy 3-week-old plants (before yellow necrotic lesions develop) using the  
203 RNeasy Plant Mini Kit (Qiagen). All results shown include data from three biological replicates;  
204 for each biological replicate, three technical replicates were performed for each of three samples.  
205 Transcript levels for each gene was normalized against the geometric mean of the threshold cycle  
206 (ct) values of the two reference genes (Biazzi et al., 2015), namely *UBQ5* and *EF1α*. Finally,  
207 relative abundance of transcripts was calculated using the  $2^{-\Delta\Delta Ct}$  method (Livak and Schmittgen  
208 2001). Semi-quantitative RT-PCR was performed as described (Veley et al., 2014). For **Figure**

209 **S3A**, 10  $\mu$ M DEX (Sigma-Aldrich), dissolved in 0.016% ethanol, was infiltrated into 5-week-old  
210 leaves. Tissue was harvested for RNA isolation 12 h post-infiltration. The primers used are listed  
211 in **Table S1**.

212

### 213 **Immunodetection**

214 Total proteins were extracted from non-chlorotic leaves of three-week-old plants as described  
215 (Veley et al. 2014). Proteins samples were resolved by 10% SDS-PAGE and transferred to  
216 polyvinylidene difluoride membranes (Millipore) for 16 h at 100 mA. Transferred proteins were  
217 probed with anti-tubulin (Sigma, 1:10,000 dilution) and anti-GFP (Takara Bio, 1:5,000 dilution)  
218 antibodies with incubation for 1 h and 16 h, respectively. After incubation for 1 h with  
219 horseradish peroxidase-conjugated anti-mouse secondary antibodies (1:10,000 dilution;  
220 Millipore). Detection was performed using the SuperSignal West Dura Detection Kit (Thermo  
221 Fisher Scientific).

222

### 223 **Statistical analyses**

224 Statistical evaluations were conducted using R Studio software (RStudio) and GraphPad Prism 8  
225 software. Statistical differences were analyzed as indicated in the figure legends.

226

### 227 **Trypan blue staining and quantification**

228 Cell death was visualized in leaves of three to four-week-old soil-grown plants using Trypan  
229 blue staining as described (Veley et al., 2014). Images were obtained with an Olympus DP80  
230 equipped with a cooled color digital camera. The size of Trypan blue stained regions was  
231 quantified using ImageJ software as described (Fernández-Bautista et al., 2016).

232

### 233 **Detection and quantification of reactive oxygen species**

234 Superoxide anion radical accumulation was detected by NitroBlue Tetrazolium chloride (NBT;  
235 Sigma) as described previously (Wilson et al., 2016). The amount of formazan was determined  
236 by measuring lysates at an absorbance of 700 nm using a 96-well microplate reader (Infinite 200  
237 PRO; Tecan). Absorbance reads were normalized to the fresh weight of the leaves. H<sub>2</sub>O<sub>2</sub> levels  
238 were measured by 3,3'-diaminobenzidine (DAB, Sigma) staining (Veley et al., 2014). For the  
239 quantitative measurement of hydrogen peroxide concentrations, the Amplex Red

240 Hydrogen/Peroxidase Assay Kit (Molecular Probes, Invitrogen) was used, following the  
241 manufacturer's instructions and as described in (Wilson et al., 2016).

242

### 243 **Split-Ubiquitin Yeast two hybrid assay (mbSUS)**

244 Intramolecular interactions between variants of the MSL10 N- and C-termini were determined  
245 using the mating-based split-ubiquitin system as described (Obrdlik et al., 2004; Lee et al.,  
246 2019). Briefly, cDNAs corresponding to the N terminal (1–460) with or without mutation of their  
247 phosphosites, the C-terminal (461-734) half of MSL10, or the soluble N- and C- terminal  
248 domains (MSL10<sub>1-164</sub>, MSL10<sub>553-734</sub> and MSL10<sup>S640L</sup><sub>553-734</sub>) were cloned and recombined into  
249 the destination vector pEarleyGate103 (Earley et al., 2006) and pDEST-VYCE(R)GW or  
250 pDEST-VYNE(R)GW (Gehl et al., 2009) binary vectors using LR Clonase II (Thermo Fisher  
251 Scientific). Using universal primers attB1-F and attB2-R, truncated MSL10 sequences were  
252 amplified. The primers are listed in **Table S1**. The C-terminus containing PCR products (insert)  
253 and corresponding pMetYCGate (Cub vector) were double digested with PstI+HindIII restriction  
254 enzymes, while the N-terminus containing PCR products and corresponding pXNGate21-3HA  
255 (NubG vector) were double digested with EcoRI+SmaI restriction enzymes. Subsequently, these  
256 gel-purified digested inserts and Cub or Nub vectors were co-transformed into yeast strain  
257 THY.AP4 and THY.AP5, respectively. The Cub and Nub clones were plated and selected on  
258 Synthetic Complete media lacking leucine and Synthetic Complete media lacking tryptophan and  
259 uracil, respectively. Similar to pXNGate21-3HA, N-terminus of MSL10 was also cloned into  
260 pXNGateWT (a positive control for interaction with Cub) and transformed in yeast strain  
261 THY.AP4. Diploid cells were generated by mating for two days on Synthetic Complete media  
262 lacking Leu, Trp, and Ura. After three days of growth on Synthetic Minimal media, the strength  
263 of interaction between the Nub and Cub fusions were quantified by in diploid cells using a  
264 colorimetric reporter assay with CPRG, a chlorophenol red-β-D-galactopyranoside as its  
265 substrate. All the yeast vectors were obtained from Arabidopsis Biological Resource Center. The  
266 PCR primers used for creating constructs for mbSUS assay are listed in **Table S1**. All the yeast  
267 vectors were obtained from Arabidopsis Biological Resource Center.

268

### 269 **Bimolecular Fluorescence Complementation (BiFC) assay**

270 Entry vectors containing various truncated versions of the *MSL10* coding region were  
271 recombined into the binary vectors pDEST-VYCE(R)GW or pDEST-VYNE(R)GW (Gehl et al.,  
272 2009), which carry the C-terminal or N-terminal fragment of Venus YFP, respectively, using LR  
273 Clonase. The PCR primers used for cloning of BiFC constructs are listed in **Table S1**. In all  
274 cases, *MSL10* fragments were tagged at the C-terminus. These plasmids were introduced into  
275 *Agrobacterium strain GV3101* and pairwise combinations were co-infiltrated into 4- to 6-week-  
276 old *N. benthamiana* leaves as described (Waadt and Kudla, 2008). To suppress  
277 posttranscriptional gene silencing, each construct pair was co-infiltrated with *Agrobacterium*  
278 strain *AGL-1* harboring p19 (Voinnet et al., 2002). Infiltrated abaxial leaf areas were examined  
279 for YFP signal using a confocal microscope (Olympus Fluoview FV 3000) at 3 to 5 d post-  
280 inoculation. The experiments were performed at least three times using different batches of  
281 plants; for each biological replicate, three independent *N. benthamiana* plants were infiltrated.

282

### 283 **Accession numbers**

284 GenBank accession numbers used in **Figure 1** are: *Arabidopsis thaliana* (NP\_196769.1),  
285 *Arabidopsis lyrata* (XP\_002873549.1), *Brassica rapa* (XP\_009121883.1), *Brassica napus*  
286 (XP\_013676093.1), *Camelina sativa* (XP\_010453270.1), *Populus trichocarpa*  
287 (POPTR\_0006s14640g), *Medicago truncatula* (XP\_003603202.2), *Vitis vinifera*  
288 (XP\_002279755.1), *Solanum lycopersicum* (XP\_004245056.1), *Solanum tuberosum*  
289 (XP\_006350354.1), *Zea mays* (XP\_008649202.1), *Oryza sativa* (XP\_015641284.1), *Sorghum*  
290 *bicolor* (XP\_002438025.1), *Brachypodium distachyon* (XP\_003560953.1), *Setaria italica*  
291 (XP\_004964936.1).

292

293 The rest of the genes referred to in this study correspond to the following Arabidopsis Genome  
294 Initiative locus identifiers: *MSL9* (*At5G19520*), *MSL10* (*At5G12080*), *RAP2.6* (*At1g43160*), *AOS*  
295 (*At5g42650*), *LOX2* (*At3g45140*), *PDF1.2* (*At5G44420*), *SAG12* (*At3g20770*), *PERX34*  
296 (*At3g49120*), *DOX1* (*At3g01420*), *OSM34* (*At4G11650*), *UBQ5* (*At3g62250*), *EF1 $\alpha$*   
297 (*At5g60390*).

298

### 299 **RESULTS**



300 **Conservation of functionally significant residues in the soluble N- and C-terminal domains**  
301 **of putative MSL10 orthologs**

302 We investigated the conservation of eight residues previously identified as important for MSL10  
303 function: seven phosphorylation sites in the soluble N-terminus (S29, S46, S48, S57, S128,  
304 S131, and T136; and a C-terminal amino acid that is mutated in the *real* mutant (S640, Zou et  
305 al., 2015) (**Figure 1A**). The predicted N-terminal domains of putative MSL10 homologs from  
306 other flowering plants showed surprisingly low sequence conservation. However, when analysis  
307 was restricted to the *Brassicaceae* family, the 33-amino-acid region containing S29, S46, S48 and  
308 S57, and the 15-amino-acid region containing S128, S131, and T136 showed 73% amino acid  
309 identity with the *Brassica napus* homolog (**Figure 1B**). The sequence of the MSL10 C-terminus  
310 surrounding S640 was highly conserved among angiosperms (90% amino acid identity with the  
311 putative homolog from *B. napus*, 60% identity with that from *Oryza sativa*), and S640 itself was  
312 conserved in 11 of the 15 sequences analyzed (**Figure 1C**). To summarize, phosphosites in the  
313 soluble N-terminus known to modulate the *MSL10-GFP* overexpression phenotype were not  
314 well-conserved, while S640, a residue in the soluble C-terminus known to affect MSL10  
315 function, was well-conserved among the sequences analyzed.

316

317 ***real* is a recessive gain-of-function MSL10 allele, renamed *mssl10-3G***

318 To further characterize the *real* allele, we backcrossed *real* plants to wild type *Col-0* plants. As  
319 shown in **Figure S1A**, the resulting F1 hybrid plants resembled the wild type parent, indicating  
320 that the mutation responsible for the phenotypes observed in the *real* mutant is recessive,  
321 consistent with previous findings (Zou et al., 2015). After self-pollination, the resulting F2  
322 population segregated into wild-type and *real* phenotypes at a ratio of 3:1, as expected for a  
323 recessive allele, and these results were confirmed by PCR genotyping (**Figure S1C**). In addition,  
324 *real* plants were outcrossed to *mssl10-1* null mutant plants. The F1 progenies resembled *real* in  
325 terms of leaf morphology but attained intermediate height after 8 weeks of growth (**Figure S1B**).  
326 After self-pollination, resulting F2 populations similarly segregated approximately 1:2:1 with  
327 respect to height at late stages of development (wild type like: intermediate: *real* phenotype);  
328 phenotypes were confirmed by PCR genotyping (**Figure S1C**). Thus, the phenotypic effects of  
329 the *real* lesion depend on the presence or absence of the WT *MSL10* allele, suggest that they  
330 may be dosage-dependent (as it requires two copies of the *real1* mutant allele to generate the full



331 *real* phenotype), and confirm that the phenotypes associated with the *real* mutant are due to a  
332 recessive gain-of-function point mutation in the *MSL10* gene. This allele is hereafter called  
333 *mssl10-3G*.

334

335 ***MSL10-GFP* overexpression, the *mssl10-3G* allele, and the *MSL10g<sup>7A</sup>* transgene produce**  
336 **similar phenotypes and gene expression patterns**

337 Strong constitutive overexpression of a gene often results in pleiotropic phenotypes that may not  
338 reflect its normal function (Zhang et al., 2003; Kovalchuk et al., 2013), and the addition of tags  
339 can alter protein localization, regulation, stability or function (Spartz et al., 2012). Zou et al.  
340 (2015) reported that neither estradiol-induced expression of *MSL10-FLAG* nor constitutive  
341 expression of untagged *MSL10* resulted in the phenotypes produced by constitutive expression of  
342 *MSL10-GFP*, suggesting that large tags may perturb the function of MSL10. Furthermore, we  
343 were previously unable to retrieve plants constitutively expressing *MSL10<sup>4A</sup>-GFP* (Veley et al.,  
344 2014), and while we proposed that the over-expression of phospho-dead *MSL10* was lethal, it  
345 remained possible that an unrelated defect in the transgene prevented us from isolating any  
346 transgenic plants.

347

348 To determine if the phenotypes associated with *MSL10-GFP* overexpression could be replicated  
349 at endogenous expression levels and without a GFP tag, we generated constructs to drive  
350 expression of untagged wild-type *MSL10* (*MSL10g*), phospho-dead *MSL10* S29A, S46A, S48A,  
351 S57A, S128A, S131A, and T136A (*MSL10g<sup>7A</sup>*) or phospho-mimetic *MSL10* S29D, S46D, S48D,  
352 S57D, S128D, S131E, and T136D (*MSL10g<sup>7D</sup>*), within the native *MSL10* genomic context.  
353 These constructs were introduced into the *mssl10-1* null mutant background and three  
354 independent homozygous transgenic lines from each transformation were selected for further  
355 analysis. These lines accumulated *MSL10* transcripts at levels similar or slightly higher than  
356 those of wild-type plants (**Figure S2A**).

357

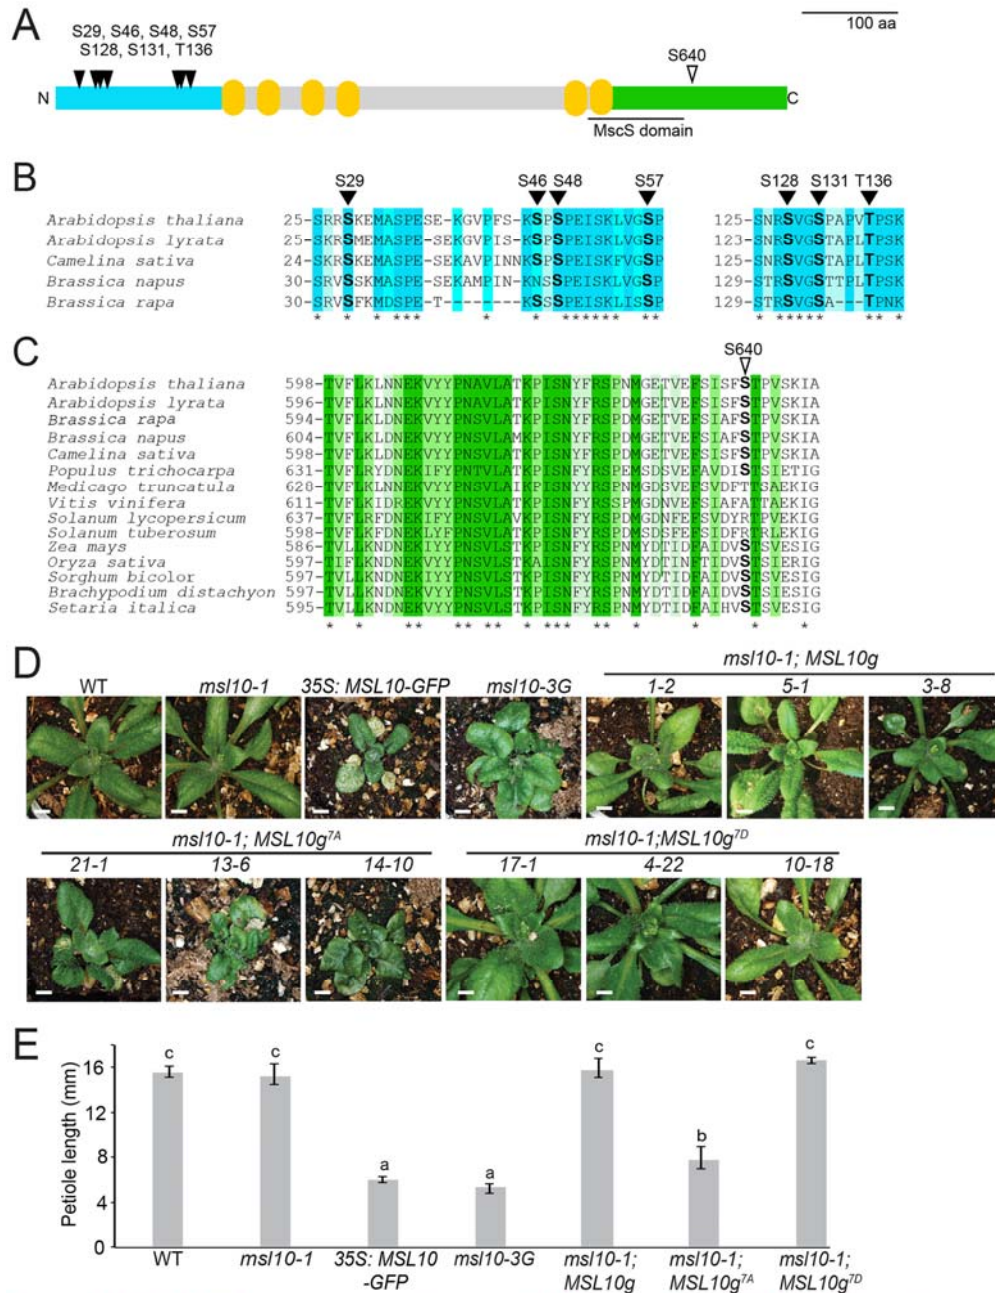

**Figure 1. MSL10-GFP overexpression lines, *msl10-3G* mutants, and MSL10g<sup>TA</sup> lines have similar whole-plant phenotypes.** (A) Predicted topology of an AtMSL10 monomer. Teal, cytosolic N-terminus; yellow, transmembrane helices; green, cytosolic C-terminus. Black triangles denote the positions of the residues mutated in this study. The MscS domain is as defined in (Veley et al. 2014). (B) Multiple alignment of protein sequences corresponding to the N-terminus of putative AtMSL10 orthologs in the Brassicaceae family. Darker teal shading indicates higher conservation score and identical amino acids with an asterisk. (C) Multiple alignment of protein sequences corresponding to the C-terminus of putative AtMSL10 orthologs in selected flowering plants. Conservation of residues is indicated as in (B). (D) and (E) T4 homozygous lines overexpressing MSL10-GFP in the Col-0 background (line 15-2), T3 homozygous lines expressing MSL10g, or MSL10g<sup>TD</sup> in the *msl10-1* background, and T3 segregating or T3 homozygous lines expressing MSL10g<sup>TA</sup> in the *msl10-1* background were selected for comparison. (D) Whole-plant images of 25-day-old plants of the indicated genotypes grown side-by-side at 21°C under a 24-h light regime. Bar = 0.5 cm. (E) Petiole length of the fourth or fifth leaf from 28-day-old plants. Different letters indicate significant differences as determined by one-way ANOVA followed by Tukey's post-hoc test ( $P < 0.05$ ). Error bars indicate  $\pm$  SD of three replicates ( $n = 18$  per replicate).

359 Like the *MSL10-GFP* overexpression lines, the *msl10-3G* mutant and three *MSL10g*<sup>7A</sup> lines all  
360 exhibited reduced rosette size, fresh weight and plant height compared to wild-type (**Figure 1D**,  
361 **S2B-D**). Four- to five-week-old plants from these same lines also exhibited shorter petioles and  
362 broader leaf blades compared to wild-type plants (**Figure 1E**, **S2E-F**). Unlike *MSL10-GFP*  
363 overexpression lines, the *msl10-3G* mutant and *MSL10g*<sup>7A</sup> lines lacked apical dominance (**Figure**  
364 **S2G**). The *msl10-1* null mutant and *msl10-1* mutants expressing *MSL10g* or *MSL10g*<sup>7D</sup> were  
365 phenotypically indistinguishable from wild-type plants.

366

367 We next tested if *msl10-3G* mutants, *MSL10*<sup>7A</sup>*g* lines, and *MSL10-GFP* overexpression lines  
368 have similar gene expression patterns. As shown in **Figure 2A**, four genes previously shown to  
369 be upregulated in *MSL10-GFP* overexpression lines (*SENESCENCE ASSOCIATED GENE 12*  
370 (*SAG12*), *α-DIOXYGENASE (DOX1)*, *PEROXIDASE-34 (PERX34)*, and *OSMOTIN-LIKE*  
371 *PROTEIN-34 (OSM34)* (Veley et al., 2014) were also expressed at higher levels in *msl10-3G* (4-  
372 to 5-fold increase) and *MSL10g*<sup>7A</sup> lines (3- to 5-fold increase) compared to wild-type plants,  
373 although not to the same degree as in *MSL10-GFP* overexpression lines (7- to 20-fold increase).  
374 Similarly, four genes previously shown to be upregulated in *real* mutants, *LIPOXYGENASE2*  
375 (*LOX2*), *PLANT DEFENSIN (PDF1.2)*, *ALLENE OXIDASE (AOS)* and *RAP2.6* (Zou et al.,  
376 2015) were also induced in *MSL10-GFP* overexpression lines (14- to 35-fold), and in *MSL10g*<sup>7A</sup>  
377 lines (5- to 12-fold) compared to the wild type (**Figure 2B**). Mutant *msl10-1*, *MSL10g*, and  
378 *MSL10g*<sup>7D</sup> lines did not exhibit statistically significant differences in expression of any of these  
379 genes compared to wild-type plants. We also observed ectopic cell death and a similar induction  
380 of *SAG12*, *DOX1*, *OSM34* and *PERX34* in response to inducible expression of wild-type and  
381 phospho-dead (but not phospho-mimetic) MSL10 (**Figure S3**).

382

383 Besides these distinct morphological defects, *MSL10-GFP* overexpression lines also exhibited  
384 constitutively elevated levels of ROS and ectopic cell death (Veley et al. 2014). This prompted  
385 us to investigate whether similar hyper-accumulation of ROS and cell death were displayed by  
386 the *MSL10g*<sup>7A</sup> or *msl10-3G* lines. To examine superoxide radical (O<sup>2-</sup>) and hydrogen peroxide  
387 (H<sub>2</sub>O<sub>2</sub>) content, we employed nitroblue tetrazolium (NBT) and 3,3'-deaminobenzidine (DAB)  
388 staining of three-week old rosette leaves, respectively (Myouga et al. 2008, Wilson et al. 2016).  
389 An Amplex Red-coupled fluorescence assay was performed for quantifying H<sub>2</sub>O<sub>2</sub> levels. *MSL10-*

390 *GFP* overexpression lines, the *msl10-3G* allele, and lines expressing *MSL10g*<sup>7A</sup> all displayed  
391 hyperaccumulation of both superoxide and H<sub>2</sub>O<sub>2</sub>, but not *msl10-1*, *MSL10g* and *MSL10*<sup>7D</sup> lines  
392 (**Figure S4**). *MSL10-GFP* overexpression lines, the *msl10-3G* allele, and lines expressing  
393 *MSL10g*<sup>7A</sup> all displayed ectopic cell death, as assessed by Trypan blue staining, compared to  
394 wild-type plants. Ectopic cell death was not observed in *msl10-1*, *MSL10g* and *MSL10*<sup>7D</sup> lines  
395 (**Figure S5**).

396

397 Thus, overexpression of *MSL10-GFP*, expression of untagged *MSL10*<sup>7A</sup> at endogenous levels in  
398 the *msl10-1* background, and the C-terminal point mutation in the *msl10-3G* allele all lead to  
399 growth retardation, defects in petiole length, overaccumulation of ROS, and the upregulation of  
400 eight hallmark genes. While the *MSL10-GFP* overexpression line *15-2* was the most severely  
401 affected in all cases, and the only line to display yellowish-brown patches on rosette leaves  
402 (**Figure 1D**), all of these phenotypes could be generated to various degrees of severity without  
403 overexpression and/or a C-terminal tag, and thus are likely to be related to the normal function of  
404 MSL10. Furthermore, these phenotypes are a direct, rather than developmental, effect of ectopic  
405 MSL10 activation.



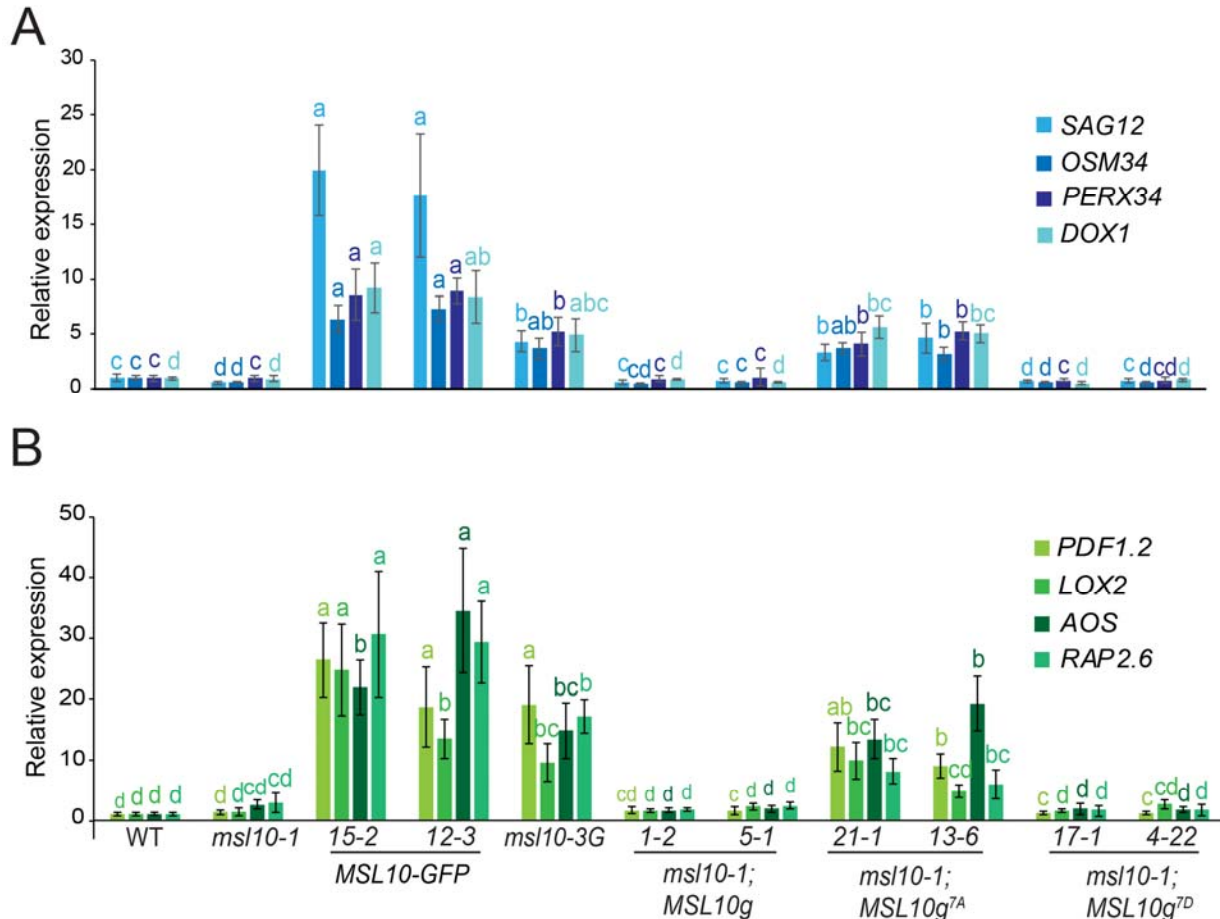

**Figure 2. *MSL10-GFP* overexpression lines, *msl10-3G* mutants, and *MSL10g<sup>7A</sup>* lines display similar expression profiles.** Quantitative RT-PCR analysis of four genes previously shown to be upregulated in *35S:MSL10-GFP* overexpression lines (A) and four genes previously shown to be upregulated in the *msl10-3G* background (B). cDNA was synthesized from total RNA extracted from rosette leaves of three-week-old plants grown at 21°C under 24 hours of light. Expression levels of respective genes were normalized to both *EF1 $\alpha$*  and *UBQ5*. Mean fold-change values relative to the wild type are plotted, with error bars showing  $\pm$  SE of the mean of three biological replicates. Different letters indicate significant difference as determined by one-way ANOVA followed by Tukey's post-hoc test ( $P < 0.05$ ). For transgenics, two independent T3 or T4 homozygous lines were selected for comparison.

406

407 We interpret these data to mean that high levels of wild-type MSL10, basal levels of MSL10 that  
 408 is dephosphorylated at the N-terminus, or basal levels of MSL10 harboring the S640L lesion all  
 409 lead to a set of pleiotropic phenotypes through the same, as yet unknown, molecular mechanism.  
 410 A lack of MSL10-specific antibodies prevented us from measuring protein levels in untagged  
 411 lines, so it is formally possible that MSL10 phospho-dead lesions or the S640L lesion alter  
 412 protein stability in the absence of a GFP tag. However, these lesions do not alter stability when  
 413 fused to a GFP tag (see Veley et al., 2014 and **Figure 3B** below).

414

415 **Phospho-mimetic lesions in the MSL10 N-terminus suppress *msl10-3G* phenotypes**

416 Given that mutations in the N-terminus (*MSL10g<sup>7A</sup>*) and the C-terminus (*mssl10-3G*) produce  
 417 similar phenotypes, we tested for a genetic interaction between these two soluble domains. The  
 418 *mssl10-3G* (S640L) mutation was introduced into the *35S:MSL10-GFP* and *35S:MSL10<sup>7D</sup>-GFP*  
 419 transgenes to make *MSL10<sup>S640L</sup>-GFP* and *MSL10<sup>7D,S640L</sup>-GFP*. As expected, overexpression of  
 420 *MSL10-GFP* and *MSL10<sup>S640L</sup>-GFP* lead to growth retardation, ectopic cell death (as assessed by  
 421 the occurrence of yellowish-brown lesions on rosette leaves and Trypan blue staining), and  
 422 enhanced H<sub>2</sub>O<sub>2</sub> accumulation in rosette leaves, while overexpression of phospho-mimetic  
 423 *MSL10<sup>7D</sup>-GFP* did not (**Figure 3A**). *MSL10<sup>7D,S640L</sup>-GFP* plants were indistinguishable from wild  
 424 type or *MSL10<sup>7D</sup>-GFP* plants. Immunoblotting showed that these phenotypic differences cannot  
 425 be attributed to differences in protein abundance (**Figure 3B**), and likely reflect the inability of  
 426 *MSL10<sup>7D</sup>-GFP* and *MSL10<sup>7D,S640L</sup>-GFP* to activate downstream signaling. Thus, N-terminal  
 427 phospho-mimetic substitutions prevent or block the phenotypes produced by the C-terminal  
 428 lesion S640L found in the *mssl10-3G* mutant.

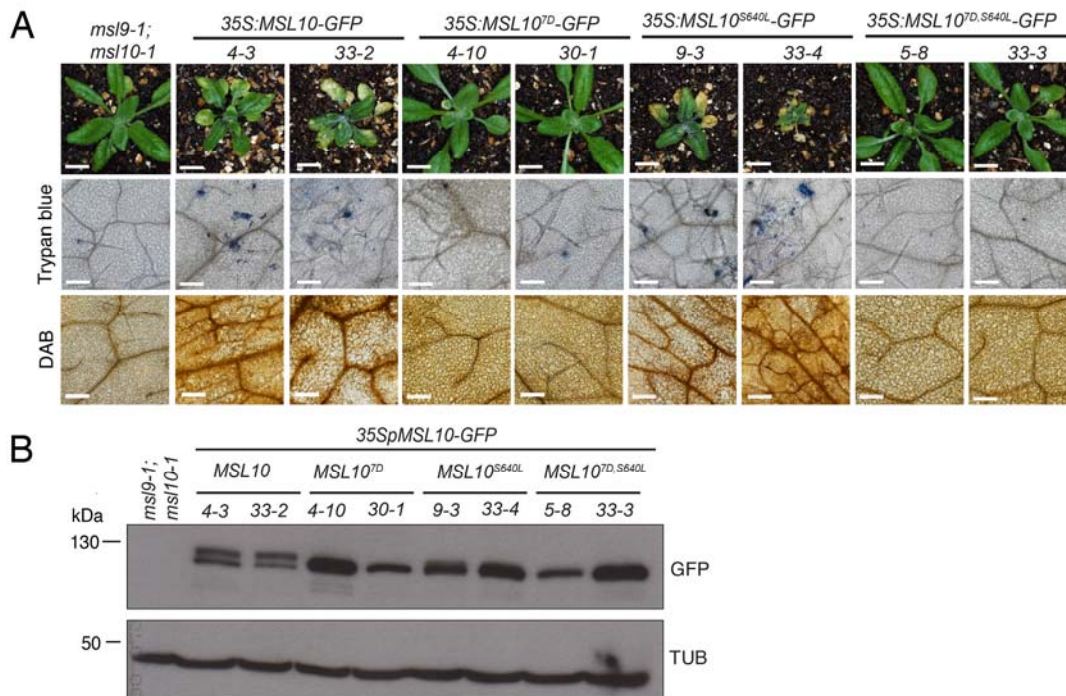

**Figure 3. Phospho-mimetic substitutions in the MSL10 N-terminus suppress phenotypes associated with overexpression of MSL10<sup>S640L</sup>.** (A) Top row: Images of three-week-old plants grown at 21°C overexpressing wild-type MSL10-GFP, phospho-mimetic MSL10<sup>7D</sup>-GFP, MSL10<sup>S640L</sup>-GFP, or MSL10<sup>7D,S640L</sup>-GFP. Overexpression lines were generated in the *mssl10-1;mssl10-1* background, phenotypically indistinguishable from *mssl10-1*. Two independent homozygous T3 lines for each transgene are shown. Bar = 0.5 cm. Middle row: Trypan blue staining of four-week old leaves from the above T3 plants to visualize ectopic cell death. Bottom row: DAB staining of five-week-old leaves to detect the accumulation of H<sub>2</sub>O<sub>2</sub>. For leaf images, bar = 0.2 mm. (B) Immunoblot analysis of MSL10-GFP variants in rosette leaves of two-week old plants. MSL10-GFP was detected with an anti-GFP primary antibody (top), and then the blot was stripped and re-probed with an anti- $\alpha$ -tubulin primary antibody (bottom). Expected protein sizes are indicated at the left according to a commercially available standard. The two forms of MSL10-GFP that migrate slower on SDS-PAGE may result from posttranslational modifications.

430 **The soluble N- and C- termini of MSL10 interact directly in two protein-protein**  
431 **interaction assays**

432 To assess whether this genetic interaction between the N- and C-termini of MSL10 might be  
433 mediated through physical interactions, we first employed the mating-based split-ubiquitin yeast  
434 two-hybrid assay (mbSUS) (Reinders et al., 2002). We previously showed that MSL10 can  
435 interact with itself in this assay, but not with close relative MSL9—as expected for a homomeric  
436 channel (Veley et al., 2014). We repeated these results and further observed that MSL10 does not  
437 interact with an unrelated membrane protein, KAT1 (Obrdlik et al., 2004) (**Figure 4A**).

438  
439 To test for interactions specific to the N- and C-termini, we first split MSL10 into two halves, the  
440 first comprising the N-terminal domain and the first four TM helices (MSL10<sub>1-460</sub>), and the  
441 second comprising the fifth and sixth TM helix as well as the C-terminal domain (MSL10<sub>461-734</sub>).  
442 These two halves of MSL10 displayed a strong interaction, providing support for intra- or inter-  
443 molecular interactions between different domains of MSL10 (**Figure 4A**). Furthermore, the  
444 soluble N- terminus (MSL10<sub>1-164</sub>) and the C-terminal half of MSL10 (MSL10<sub>461-734</sub>) interacted,  
445 as did the N-terminal half of MSL10 (MSL10<sub>1-460</sub>) and its soluble C-terminus (MSL10<sub>553-734</sub>).  
446 This result showed that the middle part of the protein—which contains all the TM helices—is not  
447 required for self-association. Almost no interaction was detected between the N-terminal half  
448 and itself or between the C-terminal half and itself. None of these interactions were appreciably  
449 affected by the presence of the S640L lesion (indicated as MSL10\*, **Figure 4A**), phospho-mimic  
450 or phospho-dead residues (**Figure 4B**), nor by any combination of these N- and C-terminal  
451 lesions (**Figure 4B**).



## FIGURE 4

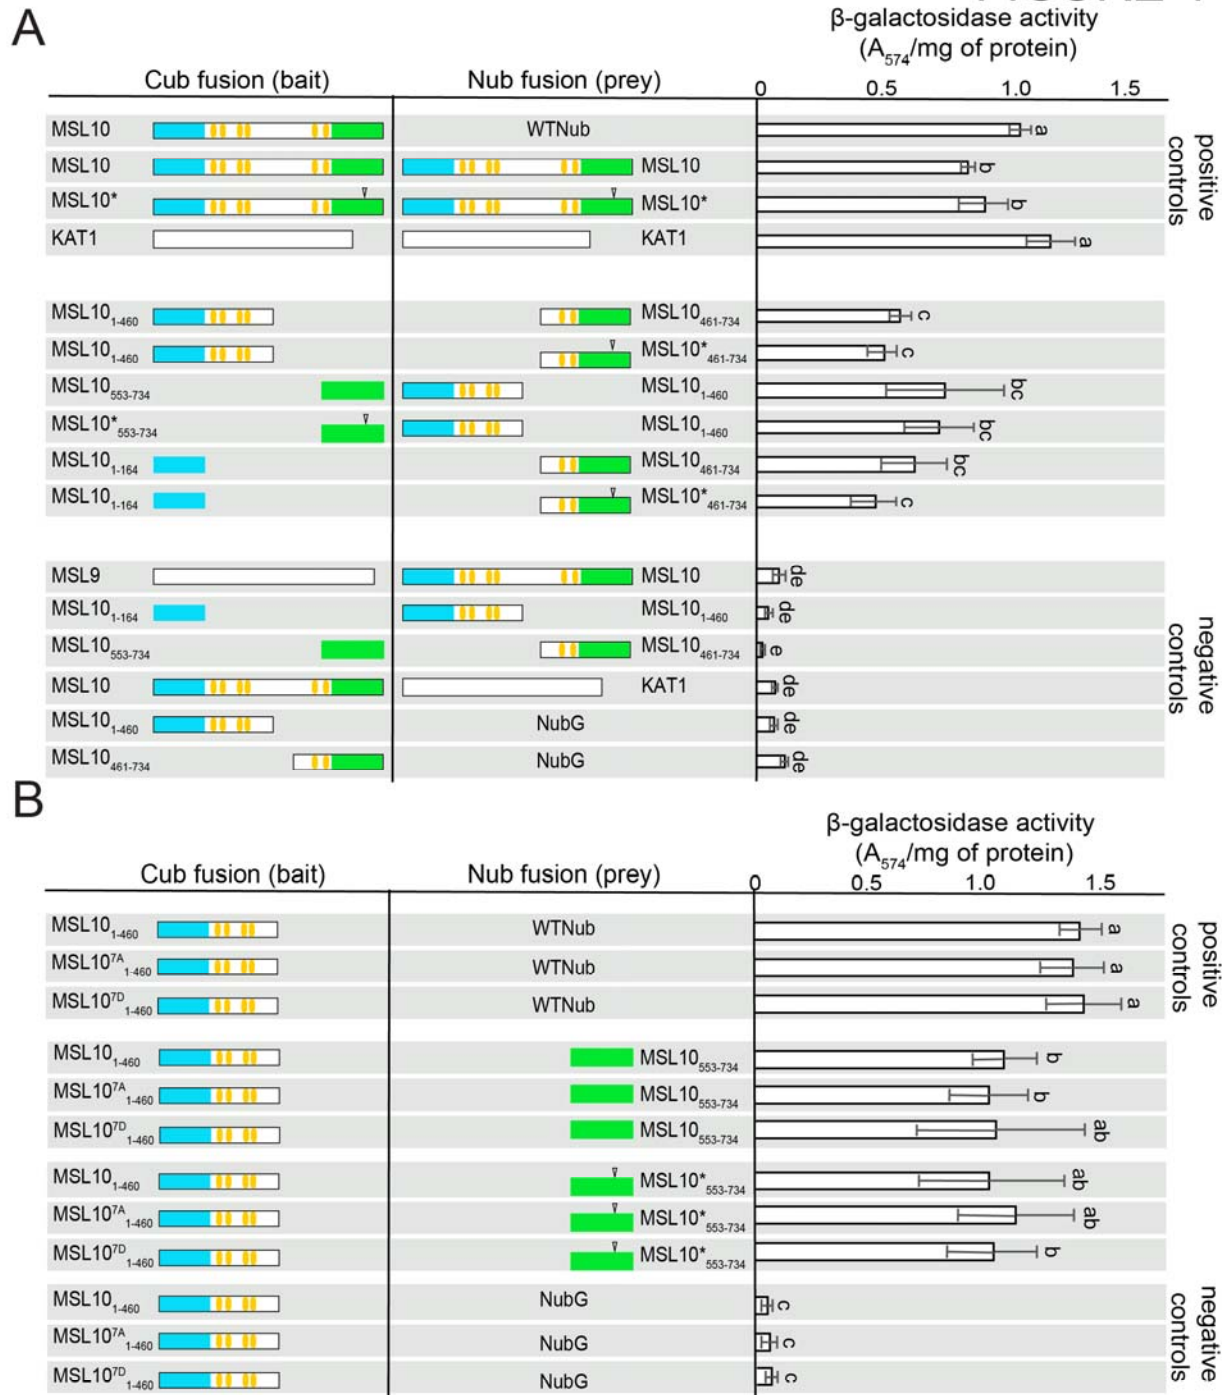

**Figure 4. The soluble N- and C- termini of MSL10 interact in the split ubiquitin yeast two hybrid.**

(A) Specific interactions between the N- and C-termini of MSL10 do not require TM helices and are unaffected by the S640L lesion. (B) Phospho-mimic or phospho-dead lesions in the N-terminus do not affect interactions with the soluble C-terminus. Left and middle panels indicate fusions with the C- and N-terminal domains of ubiquitin (Cub and Nub, respectively).

Teal, cytosolic N-terminus; yellow, transmembrane helices; green, cytosolic C-terminus. Asterisks and open arrows indicate the S640L lesion. Right panel, results from liquid assay for  $\beta$ -galactosidase activity. Data presented are means  $\pm$  SD of three replicates. Different letters indicate significant differences as determined by one-way ANOVA followed by Tukey's post-hoc test ( $P < 0.05$ ).



453 To validate these mbSUS interactions, to investigate whether they can occur *in planta*, and to  
454 assess interactions without requiring one partner to be tethered to the membrane, we employed a  
455 bimolecular fluorescence complementation (BiFC) assay as described in Gehl et al. (2009). The  
456 N- and C-terminal halves of YFP (YN- and YC-) were fused to MSL10 variants and transiently  
457 expressed in leaf epidermal cells of *Nicotiana benthamiana*. As expected, co-infiltration of  
458 MSL10-YN with MSL10-YC resulted in strong YFP signal at the periphery of the cell (**Figure**  
459 **5**). Strong YFP fluorescence was also detected when soluble MSL10<sub>553-734</sub>-YN was co-infiltrated  
460 with soluble MSL10<sub>1-164</sub>-YC or with the N-terminal half of the protein, MSL10<sub>1-460</sub>-YC (**Figure**  
461 **S6A**). The C-terminal half of MSL10 formed aggregates (**Figure S6B**) so we only used the  
462 soluble C-terminus (MSL10<sub>553-734</sub>) in this experiment. Neither the N-terminus nor the C-  
463 terminus of MSL10 was able to self-associate in this assay, as only patchy, diffuse signal--  
464 similar to that observed with unfused YN or YC--was observed in these cases. Furthermore,  
465 neither of these domains were able to interact with MSL9 or KAT1 (**Figure 5**, **Figure S6A**).  
466 Consistent with the mbSUS assay results, the S640L mutation (again indicated as MSL10\*) did  
467 not affect any interactions; nor did the introduction of phospho-mimetic or phospho-dead lesions  
468 into the N-terminal sequences. These results demonstrate a direct physical interaction between  
469 the soluble N- and C- termini of MSL10 and show that it does not require tethering to the  
470 membrane and is unaffected by the S640L lesion or by the phosphorylation status of the N-  
471 terminus.  
472

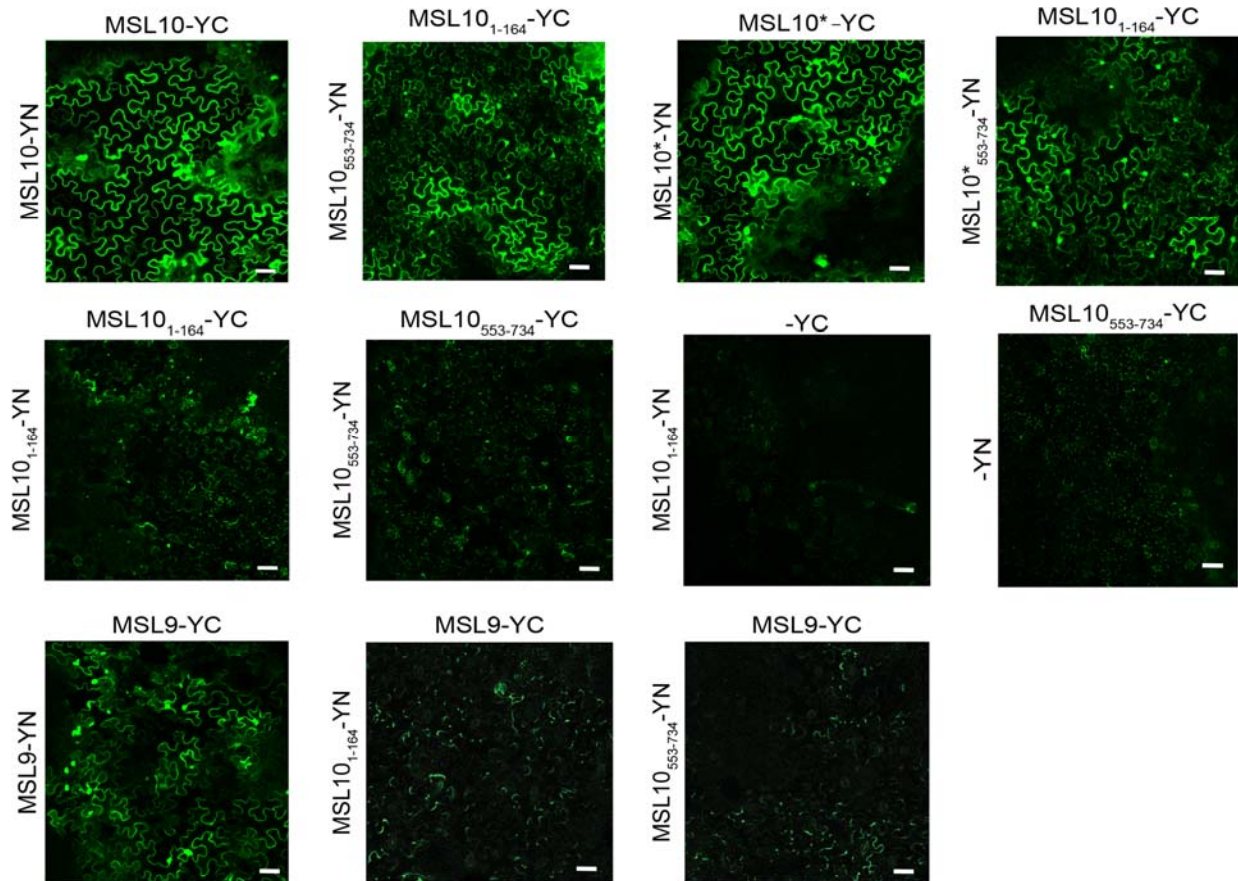

**Figure 5. The soluble N- and C- termini of MSL10 interact in the bi-molecular fluorescence complementation (BiFC) assay.** Confocal laser scanning micrographs of the abaxial surface of *N. benthamiana* leaves 3 to 5 days after infiltration with *Agrobacterium* harboring the indicated BiFC construct pairs. Scale bar, 50  $\mu$ m. Identical acquisition settings were used in all images. All experiments were repeated at least three times. MSL10\* indicates MSL10<sup>S640L</sup>.

473

474

## 475 DISCUSSION

476

477 Here we present several lines of evidence in support of a direct interaction between the soluble  
478 N- terminus and the soluble C-terminus of the plant mechanosensitive ion channel *AtMSL10*.  
479 First, a suite of phenotypes was produced by overexpression of *MSL10-GFP*, by native  
480 expression of phospho-dead substitutions in MSL10's N-terminus, or by the S640L point  
481 mutation in its C-terminus (**Figure 1, 2, S2, S3, S4 and S5**). Second, phospho-mimetic  
482 substitutions suppressed the effect of S640L when both types of lesions were present in the same  
483 monomer (**Figure 3**). Third, the soluble N- and C-termini of MSL10 interacted in two protein-

484 protein interaction assays in a manner independent of phospho-variant mutations or the S640L  
485 lesion (**Figure 4 and Figure 5**).

486

487 To date, functional characterization of MSL10 has been based on overexpression of *MSL10-GFP*  
488 in *N. benthamiana* and Arabidopsis (Veley et al., 2014). Here, we show that two additional types  
489 of *MSL10* gain-of-function lines (plants expressing endogenous levels of untagged *MSL10g<sup>7A</sup>* or  
490 harboring the *msl10-3G* allele) phenocopy *MSL10-GFP* overexpression lines, as does inducible  
491 overexpression of MSL10<sup>7A</sup> (**Figure 1, 2, S2, S3**). Thus, the ability of MSL10 to induce growth  
492 retardation, ectopic cell death, hyperaccumulation of H<sub>2</sub>O<sub>2</sub>, and the induction of genes related to  
493 ROS, and cell death does not require overexpression or the presence of a tag, and therefore is  
494 likely to be related to the normal function of MSL10. We note that plants overexpressing  
495 untagged wild type *MSL10* do not show these phenotypes (Zou et al., 2015). Perhaps, in this  
496 context, a large tag improves MSL10 stability.

497

498 We thus hypothesize that the ability to trigger cell death is one of the functions of MSL10. But  
499 since ectopic cell death is only seen when endogenously expressed MSL10 is mutated, it could  
500 be claimed that the cell death we observe does not reflect of the normal function of MSL10, but  
501 rather is a non-specific toxicity associated with overexpression of mutants. The results presented  
502 here with the *msl10-3G* mutation (*MSL10<sup>S640L</sup>*) show that this is unlikely. First, the MSL10<sup>S640L</sup>  
503 mutation does not trigger cell death when the 7D substitutions are introduced into the same  
504 monomer (**Figure 3A**), which argues against the MSL10<sup>S640L</sup> mutation being inherently toxic.  
505 Secondly, the *msl10-3G* allele is recessive (Zou et al., 2015, and **Figure S1A**), and therefore is  
506 not exerting a general toxic effect. Finally, it is difficult to imagine how lesions in the N-  
507 terminus, the C-terminus, and overexpression would all have the same non-specific and toxic  
508 effect. Our current studies investigate whether increased membrane tension can cause WT  
509 MSL10 to trigger cell death, as hypothesized in **Figure 6A**, to more firmly establish cell death as  
510 a function of MSL10.

511

512 MSL10 likely functions as a homo-oligomer similar to *EcMscS*, a homoheptameric channel  
513 (Bass et al., 2002; Sukharev, 2002). Thus, the interactions we observe between the N- and the C-  
514 terminus could be between domains on the same monomer, or between domains on different

515 monomers once they are assembled into a channel. To distinguish between these two possibilities  
516 will require further study. These interactions occur in the absence of the membrane spanning  
517 domains, at least in the transient expression system used for BiFC (**Figure 5**). Neither N-terminal  
518 phosphorylation status nor the C-terminal lesion S640L had any impact on the self-association of  
519 MSL10 in either BiFC or mbSUS assays, suggesting that this is a stable interaction and is not a  
520 regulated step in the activation of MSL10 (**Figure 4, 5**).

521  
522 Based on these results, we propose a three-step model for MSL10 activation, illustrated in  
523 **Figure 6**. According to this model, phosphorylation of its N-terminal domain maintains MSL10  
524 in its inactive form (**Figure 6A**). When membrane tension is increased, the channel opens, first  
525 resulting in a structural rearrangement at the C-terminus. Second, this conformational change is  
526 transduced to the N-terminal domain. Third, the subsequent conformational change of the N-  
527 terminus results in its dephosphorylation. The dephosphorylated N-terminal domain (depicted in  
528 red) is then capable of triggering a cell death signaling cascade through an unknown mechanism.  
529 Dephosphorylation could arise through conformational changes that directly (or indirectly  
530 through accessory proteins like 14-3-3 proteins (Moeller et al., 2016)) make the N-terminus more  
531 accessible to cytosolic phosphatases or less accessible to kinases. Conformational changes that  
532 lead to altered phosphorylation status has been previously shown to activate hormone-receptor  
533 complexes in plants (Zhang et al., 2014; Farrell and Breeze, 2018; Wang et al., 2019).

534  
535 In the case of *MSL10-GFP* overexpression (**Figure 6B**), we propose that the appropriate kinase  
536 is not sufficient to maintain the N-terminus in its dephosphorylated form, leading to the  
537 accumulation of phosphorylated MSL10-GFP and constitutive activation of the cell death  
538 signaling pathway. Phospho-dead versions of MSL10 (MSL10g<sup>7A</sup>) are constitutively active and  
539 do not require added tension; conversely, phospho-mimetic version of MSL10 (MSL10g<sup>7D</sup>) are  
540 maintained in an inactive state (**Figure 6C**). As for plants harboring the *MSL10<sup>S640L</sup>-GFP*  
541 transgene or the *mssl10-3G* mutant (**Figure 6D**), the S640L mutation may mimic the  
542 conformational change that occurs during opening of the channel, bypassing the normal  
543 activation of signaling by membrane tension and leading to constitutive activation. Alternatively,  
544 S640L may alter the tension sensitivity or conductivity of MSL10. This effect, however, is  
545 blocked by the presence of N-terminal phospho-mimetic substitutions, as shown in plants

546 constitutively expressing *MSL10*<sup>7D, S640L</sup>-GFP. Thus, this three-step model is sufficient to explain  
547 the phenotypic and genetic interaction data documented above.

548

549 In summary, our three-step model for MSL10 activation, which involves an intra- and/or  
550 intermolecular interaction between the soluble N- and C- termini of MSL10, explains the  
551 phenotypic similarity shared by plants overexpressing MSL10-GFP, expressing the *MSL10*<sup>7A</sup>  
552 transgene, or harboring the *msl10-3G* allele. These results begin to build the groundwork for  
553 future investigations into the molecular mechanism by which the mechanosensitive ion channel  
554 MSL10 functions.

555

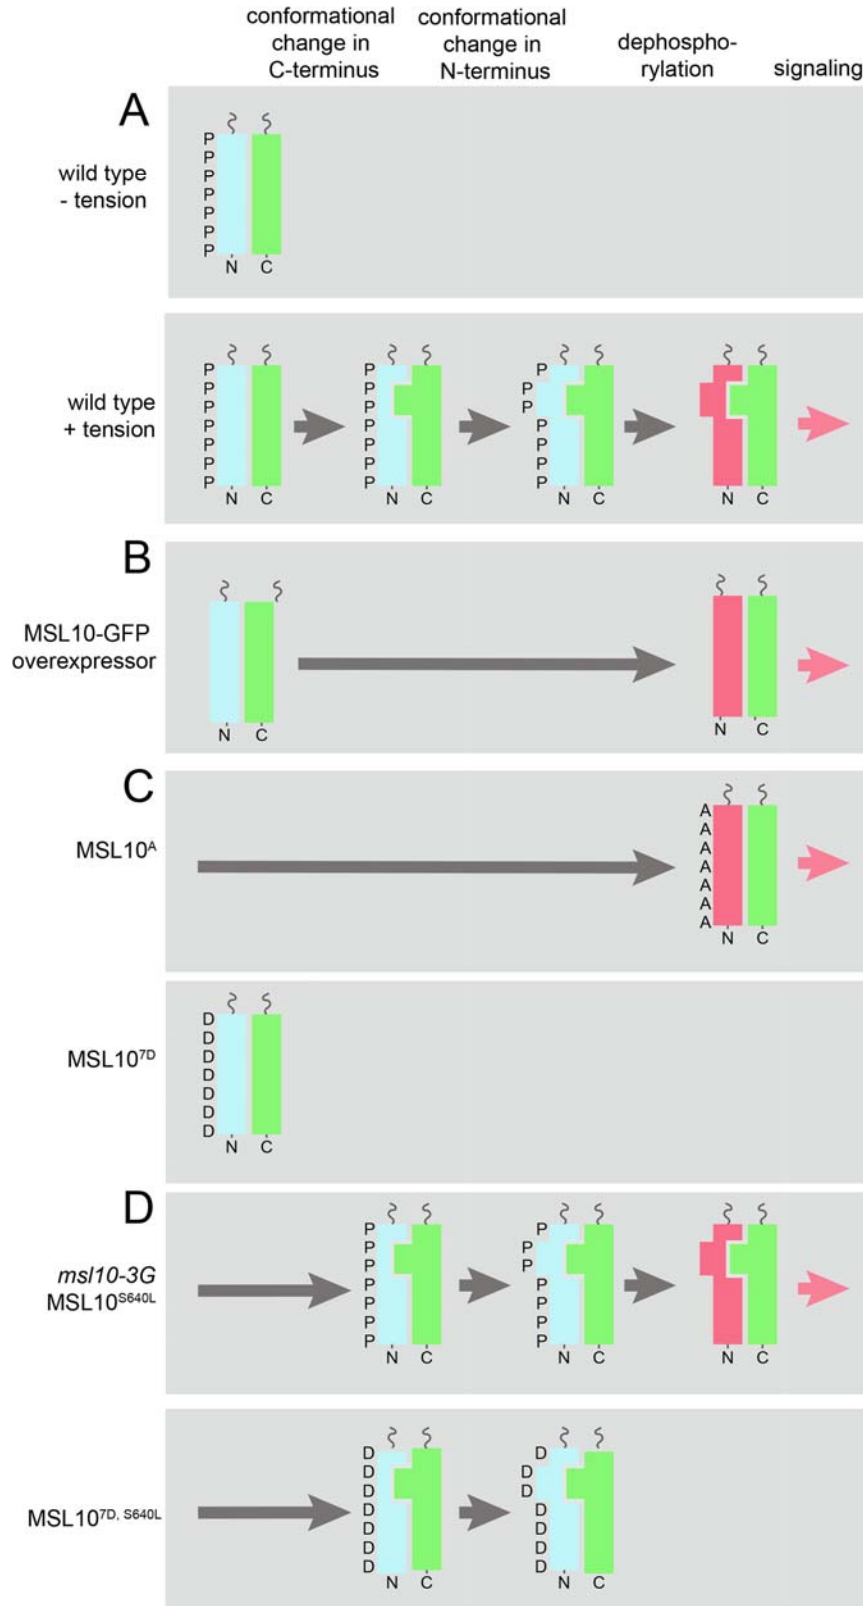

**Figure 6. A three-step model for the regulation of MSL10's cell death signaling function**

For simplicity, only the soluble N- and C-terminal domains of MSL10 are shown. They could be from the same or from different monomers. The inactive N-terminus, active N-terminus, and C-terminus are represented by rectangles colored blue, red, and green, respectively. Proposed conformational changes are indicated by changes in the shape of each rectangle. This model explains the signaling output (red arrow) observed in wild type plants (A), in response to *MSL10-GFP* overexpression (B), in the presence of MSL10 phospho-variants (C), in the presence of alleles or transgenes harboring the S640L mutation in the C-terminus (D, top), or in the presence of a transgene that combines S640L with phospho-mimetic substitutions in the N-terminus (D, bottom). See main text for more detailed explanations of each scenario.



557 **SUPPLEMENTARY DATA**

558 **Supplemental Figure 1.** *mssl10-3G* is a recessive gain-of-function allele.

559 **Supplemental Figure 2.** *mssl10-3G* allele and *MSL10g<sup>7A</sup>* transgene exhibit similar reduction in  
560 fresh weight, petiole length, plant height and apical dominance to *35S:MSL10-GFP*.

561 **Supplemental Figure 3.** DEX-inducible overexpression of *MSL10* and *MSL10<sup>4A</sup>* promotes the  
562 upregulation of MSL10-associated marker genes and ectopic cell death.

563 **Supplemental Figure 4.** Accumulation of ROS associated with expression of *35S:MSL10-GFP*,  
564 *MSL10g<sup>7A</sup>* transgene and *mssl10-3G* allele.

565 **Supplemental Figure 5.** Incidence of ectopic cell death associated with expression of *35S:MSL10-*  
566 *GFP*, *MSL10g<sup>7A</sup>* transgene and *mssl10-3G* allele.

567 **Supplemental Figure 6.** Additional controls for the BiFC assay.

568 **Supplemental Table 1.** List of primers used in this study.

569

570 **AUTHOR CONTRIBUTIONS**

571

572 D.B. and E.S.H. conceived the project and designed the experiments; J.M.S. contributed data to  
573 Figures 1C, 3C, and 4; E.S.H. contributed data to Figure 1B and conceived the model in Figure  
574 6. D.B. performed the rest of the experiments. D.B., and E.S.H. wrote the manuscript with input  
575 from J.M.S.

576

577 **ACKNOWLEDGMENTS**

578

579 We thank J.-M. Zhou (ShanghaiTech University, Shanghai) for providing *real* mutant seeds and  
580 the Arabidopsis Biological Resource Center for seeds and for vectors used in BiFC and mbSUS  
581 assays. We also are grateful to Ivan Radin, Yanbing Wang, Kari Miller and Angela Schlegel for  
582 critical reading of the manuscript. This work was supported by NSF MCB-1253103 and the NSF  
583 Center for Engineering Mechanobiology Award 1548571. J.M.S. was supported by NSF  
584 Graduate Research Fellowship DGE-1745038. No conflicts of interest declared.

585

586 **References**

587 **Aoyama, T., and Chua, N.** (1997). A glucocorticoid-mediated transcriptional induction system

- 588 in transgenic plants. *Plant Journal* **11**:605–612.
- 589 **Bass, R. B., Strop, P., Barclay, M., and Rees, D. C.** (2002). Crystal Structure of Escherichia  
590 coli MscS, a Voltage-Modulated and Mechanosensitive Channel. *Science* **298**:1582–1587.
- 591 **Basu, D., and Haswell, E. S.** (2017). Plant mechanosensitive ion channels: an ocean of  
592 possibilities. *Current opinion in plant biology* **40**:43–48.
- 593 **Bavi, N., Nikolaev, Y. A., Bavi, O., Ridone, P., Martinac, A. D., Nakayama, Y., Cox, C. D.,  
594 and Martinac, B.** (2017). Principles of Mechanosensing at the Membrane Interface. In *The  
595 Biophysics of Cell Membranes: Biological Consequences* (ed. Epanand, R. M.) and  
596 Ruyschaert, J.-M.), pp. 85–119. Singapore: Springer Singapore.
- 597 **Bawono, P., Dijkstra, M., Pirovano, W., Feenstra, A., Abeln, S., and Heringa, J.** (2017).  
598 Multiple Sequence Alignment. In *Bioinformatics: Volume I: Data, Sequence Analysis, and  
599 Evolution* (ed. Keith, J. M.), pp. 167–189. New York, NY: Springer New York.
- 600 **Bhaskara, G. B., Nguyen, T. T., and Verslues, P. E.** (2012). Unique drought resistance  
601 functions of the highly ABA-induced clade A protein phosphatase 2Cs. *Plant physiology*  
602 **160**:379–395.
- 603 **Biazzi, E., Carelli, M., Tava, A., Abbruscato, P., Losini, I., Avato, P., Scotti, C., and  
604 Calderini, O.** (2015). CYP72A67 catalyzes a key oxidative step in Medicago truncatula  
605 hemolytic saponin biosynthesis. *Molecular Plant* **8**:1493–1506.
- 606 **Clough, S. J., and Bent, A. F.** (1998). Floral dip: a simplified method for Agrobacterium -  
607 mediated transformation of Arabidopsis thaliana. *The Plant Journal* **16**:735–743.
- 608 **Earley, K. W., Haag, J. R., Pontes, O., Opper, K., Juehne, T., Song, K., and Pikaard, C. S.**  
609 (2006). Gateway-compatible vectors for plant functional genomics and proteomics. *Plant  
610 Journal* **45**:616–629.
- 611 **Farrell, B., and Breeze, A. L.** (2018). Structure, activation and dysregulation of fibroblast  
612 growth factor receptor kinases: perspectives for clinical targeting. *Biochemical Society  
613 Transactions* **46**:1753–1770.
- 614 **Fernández-Bautista, N., Domínguez-Núñez, J. A., Moreno, M. M. C., and Berrocal-Lobo,  
615 M.** (2016). Plant Tissue Trypan Blue Staining During Phytopathogen Infection. *Bio-  
616 protocol* **6**:e2078.
- 617 **Gehl, C., Waadt, R., Mendel, R., and Ha, R.** (2009). New GATEWAY vectors for High  
618 Throughput Analyses of Protein – Protein Interactions by Bimolecular Fluorescence



- 619           Complementation. *Molecular Plant* **2**:1051–1058.
- 620 **Gobert, A., Isayenkov, S., Voelker, C., Czempinski, K., and Maathuis, F. J. M.** (2007). The  
621           two-pore channel TPK1 gene encodes the vacuolar K<sup>+</sup> conductance and plays a role in K<sup>+</sup>  
622           homeostasis. *Proceedings of the National Academy of Sciences of the United States of*  
623           *America* **104**:1–6.
- 624 **Hamant, O., and Haswell, E. S.** (2017). Life behind the wall: sensing mechanical cues in  
625           plants. *BMC Biology* **15**:59.
- 626 **Hamilton, E. S., Jensen, G. S., Maksaev, G., Katims, A., Sherp, A. M., and Haswell, E. S.**  
627           (2015). Mechanosensitive channel MSL8 regulates osmotic forces during pollen hydration  
628           and germination. *Science* **350**:438–441.
- 629 **Haswell, E. S., and Meyerowitz, E. M.** (2006). MscS-like Proteins Control Plastid Size and  
630           Shape in *Arabidopsis thaliana*. *Current Biology* **16**:1–11.
- 631 **Haswell, E. S., Peyronnet, R., Barbier-Brygoo, H., Meyerowitz, E. M., and Frachisse, J. M.**  
632           (2008). Two MscS Homologs Provide Mechanosensitive Channel Activities in the  
633           *Arabidopsis* Root. *Current Biology* **18**:730–734.
- 634 **Hou, C., Tian, W., Kleist, T., He, K., Garcia, V., Bai, F., Hao, Y., Luan, S., and Li, L.**  
635           (2014). Osmosensitive calcium-permeable cation channels 632 DUF221 proteins are a  
636           family of osmosensitive calcium- permeable cation channels conserved across eukaryotes.  
637           *Cell Research* **24**:632–635.
- 638 **Jayaraman, D., Gilroy, S., and Ané, J. M.** (2014). Staying in touch: Mechanical signals in  
639           plant-microbe interactions. *Current Opinion in Plant Biology* **20**:104–109.
- 640 **Jensen, G. S., and Haswell, E. S.** (2012). Functional analysis of conserved motifs in the  
641           mechanosensitive channel homolog MscS-Like2 from *Arabidopsis thaliana*. *PLoS ONE* **7**.
- 642 **Karimi, M., Inzé, D., and Depicker, A.** (2002). GATEWAY<sup>TM</sup> vectors for *Agrobacterium*-  
643           mediated plant transformation. *Trends in Plant Science* **7**:193–195.
- 644 **Kierzkowski, D.** (2019). ScienceDirect Cellular basis of growth in plants□: geometry matters.  
645           *Current Opinion in Plant Biology* **47**:56–63.
- 646 **Kovalchuk, N., Jia, W., Eini, O., Morran, S., Pyvovarenko, T., Fletcher, S., Bazanova, N.,**  
647           **Harris, J., Beck-Oldach, K., Shavrukov, Y., et al.** (2013). Optimization of TaDREB3  
648           gene expression in transgenic barley using cold-inducible promoters. *Plant Biotechnology*  
649           *Journal* **11**:659–670.

- 650 **Lee, C. P., Maksaev, G., Jensen, G. S., Murcha, M. W., Wilson, M. E., Fricker, M., Hell, R.,**  
651 **Haswell, E. S., Millar, A. H., and Sweetlove, L. J.** (2016). MSL1 is a mechanosensitive  
652 ion channel that dissipates mitochondrial membrane potential and maintains redox  
653 homeostasis in mitochondria during abiotic stress. *Plant Journal* **88**:809–825.
- 654 **Lee, J. S., Wilson, M. E., Richardson, R. A., and Haswell, E. S.** (2019). Genetic and physical  
655 interactions between the organellar mechanosensitive ion channel homologs MSL1, MSL2,  
656 and MSL3 reveal a role for inter-organellar communication in plant development. *Plant*  
657 *Direct* **3**:e00124.
- 658 **Livak, K. J., and Schmittgen, T. D.** (2001). Analysis of relative gene expression data using  
659 real-time quantitative PCR and the 2- $\Delta\Delta$ CT method. *Methods* **25**:402–408.
- 660 **Maathuis, F. J. M.** (2011). Vacuolar two-pore K<sup>+</sup> channels act as vacuolar osmosensors. *New*  
661 *Phytologist* **191**:84–91.
- 662 **Machiyama, H., Tatsumi, H., and Sokabe, M.** (2009). Structural Changes in the Cytoplasmic  
663 Domain of the Mechanosensitive Channel MscS During Opening. *Biophysical Journal*  
664 **97**:1048–1057.
- 665 **Maksaev, G., and Haswell, E. S.** (2012). MscS-Like10 is a stretch-activated ion channel from  
666 *Arabidopsis thaliana* with a preference for anions. *Proceedings of the National Academy of*  
667 *Sciences of the United States of America* **109**:19015–20.
- 668 **Maksaev, G., Shoots, J. M., Ohri, S., and Haswell, E. S.** (2018). Nonpolar residues in the  
669 presumptive pore-lining helix of mechanosensitive channel MSL10 influence channel  
670 behavior and establish a nonconducting function. *Plant Direct* **2**:e00059.
- 671 **Martinac, B., Nomura, T., Chi, G., Petrov, E., Rohde, P. R., Battle, A. R., Foo, A.,**  
672 **Constantine, M., Rothnagel, R., Carne, S., et al.** (2013). Bacterial Mechanosensitive  
673 Channels: Models for Studying Mechanosensory Transduction. *Antioxidants & Redox*  
674 *Signaling* **20**:952–969.
- 675 **Moeller, H. B., Slengerik-Hansen, J., Aroankins, T., Assentoft, M., MacAulay, N.,**  
676 **Moestrup, S. K., Bhalla, V., and Fenton, R. A.** (2016). Regulation of the water channel  
677 aquaporin-2 via 14-3-3 $\theta$  and - $\zeta$ . *Journal of Biological Chemistry* **291**:2469–2484.
- 678 **Monshausen, G. B., and Haswell, E. S.** (2013). A force of nature: Molecular mechanisms of  
679 mechanoperception in plants. *Journal of Experimental Botany* **64**:4663–4680.
- 680 **Mori, K., Renhu, N., Naito, M., Nakamura, A., Shiba, H., Yamamoto, T., Suzaki, T., Iida,**

- 681 **H., and Miura, K.** (2018). Ca(2+)-permeable mechanosensitive channels MCA1 and  
682 MCA2 mediate cold-induced cytosolic Ca(2+) increase and cold tolerance in Arabidopsis.  
683 *Scientific reports* **8**:550.
- 684 **Murthy, S. E., Dubin, A. E., Whitwam, T., Jojoa-Cruz, S., Cahalan, S. M., Mousavi, S. A.**  
685 **R., Ward, A. B., and Patapoutian, A.** (2018). OSCA/TMEM63 are an evolutionarily  
686 conserved family of mechanically activated ion channels. *eLife* **7**:e41844.
- 687 **Nakagawa, Y., Katagiri, T., Shinozaki, K., Qi, Z., Tatsumi, H., Furuichi, T., Kishigami, A.,**  
688 **Sokabe, M., Kojima, I., Sato, S., et al.** (2007). Arabidopsis plasma membrane protein  
689 crucial for Ca<sup>2+</sup> influx and touch sensing in roots. *Proceedings of the National Academy of*  
690 *Sciences of the United States of America* **104**:3639–3644.
- 691 **Obrdlik, P., El-Bakkoury, M., Hamacher, T., Cappellaro, C., Vilarino, C., Fleischer, C.,**  
692 **Ellerbrok, H., Kamuzinzi, R., Ledent, V., Blaudez, D., et al.** (2004). K<sup>+</sup> channel  
693 interactions detected by a genetic system optimized for systematic studies of membrane  
694 protein interactions. *Proceedings of the National Academy of Sciences of the United States*  
695 *of America* **101**:12242–12247.
- 696 **Pivetti, C. D., Yen, M.-R., Miller, S., Busch, W., Tseng, Y.-H., Booth, I. R., and Saier Jr,**  
697 **M. H.** (2003). Two families of mechanosensitive channel proteins. *Microbiology and*  
698 *molecular biology reviews* □: *MMBR* **67**:66–85.
- 699 **Ranade, S. S., Syeda, R., and Patapoutian, A.** (2015). Mechanically Activated Ion Channels.  
700 *Neuron* **87**:1162–1179.
- 701 **Reinders, A., Schulze, W., Thaminy, S., Stagljar, I., Frommer, W. B., and Ward, J. M.**  
702 (2002). Intra- and intermolecular interactions in sucrose transporters at the plasma  
703 membrane detected by the split-ubiquitin system and functional assays. *Structure* **10**:763–  
704 772.
- 705 **Rowe, I., Anishkin, A., Kamaraju, K., Yoshimura, K., and Sukharev, S.** (2014). The  
706 cytoplasmic cage domain of the mechanosensitive channel MscS is a sensor of  
707 macromolecular crowding. *The Journal of General Physiology* **143**:543–557.
- 708 **Spartz, A. K., Lee, S. H., Wenger, J. P., Gonzalez, N., Itoh, H., Inzé, D., Peer, W. A.,**  
709 **Murphy, A. S., Overvoorde, P. J., and Gray, W. M.** (2012). The SAUR19 subfamily of  
710 SMALL AUXIN UP RNA genes promote cell expansion. *The Plant journal* □: *for cell and*  
711 *molecular biology* **70**:978–990.

- 712 **Sukharev, S.** (2002). Purification of the Small Mechanosensitive Channel of Escherichia coli (   
713 MscS ): the Subunit Structure , Conduction , and Gating Characteristics in Liposomes.   
714 *Biophysical Journal* **83**:290–298.
- 715 **Veley, K. M., Marshburn, S., Clure, C. E., and Haswell, E. S.** (2012). Mechanosensitive   
716 Channels Protect Plastids from Hypoosmotic Stress During Normal Plant Growth. *Current*   
717 *Biology* **22**:408–413.
- 718 **Veley, K. M., Maksaev, G., Frick, E. M., January, E., Kloepper, S. C., and Haswell, E. S.**   
719 (2014). *Arabidopsis* MSL10 Has a Regulated Cell Death Signaling Activity That Is   
720 Separable from Its Mechanosensitive Ion Channel Activity. *The Plant Cell* **26**:3115–3131.
- 721 **Voinnet, O., Pinto, Y. M., and Baulcombe, D. C.** (2002). Suppression of gene silencing: A   
722 general strategy used by diverse DNA and RNA viruses of plants. *Proceedings of the*   
723 *National Academy of Sciences* **96**:14147–14152.
- 724 **Waadt, R., and Kudla, J.** (2008). In plant visualization of protein interactions using   
725 bimolecular fluorescence complementation (BiFC). *Cold Spring Harbor Protocols* **3**:1–8.
- 726 **Wang, W., Dong, C., Naismith, J. H., Black, S. S., Edwards, M. D., Miller, S., Morrison, E.**   
727 **L., Bartlett, W., and Booth, I. R.** (2008). The structure of an open form of an E. coli   
728 mechanosensitive channel at 3.45 Å resolution. *Science* **321**:1179–1183.
- 729 **Wang, J., Wang, J., Hu, M., Wu, S., Qi, J., Wang, G., Han, Z., Qi, Y., Gao, N., Wang, H.-**   
730 **W., et al.** (2019). Ligand-triggered allosteric ADP release primes a plant NLR complex.   
731 *Science* **364**:eaav5868.
- 732 **Wilson, M. E., Mixdorf, M., Berg, R. H., and Haswell, E. S.** (2016). Plastid osmotic stress   
733 influences cell differentiation at the plant shoot apex. *Development* **143**:3382–3393.
- 734 **Yuan, F., Yang, H., Xue, Y., Kong, D., Ye, R., Li, C., Zhang, J., Theprungsirikul, L., Shrift,**   
735 **T., Krichilsky, B., et al.** (2014). OSCA1 mediates osmotic-stress-evoked Ca<sup>2+</sup> increases   
736 vital for osmosensing in Arabidopsis. *Nature* **514**:367–71.
- 737 **Zhang, X., Liang, R., Chen, X., Yang, F., and Zhang, L.** (2003). Transgene inheritance and   
738 quality improvement by expressing novel HMW glutenin subunit (HMW-GS) genes in   
739 winter wheat. *Chinese Science Bulletin* **48**:771–776.
- 740 **Zhang, J., Yu, J., and Wen, C.-K.** (2014). An alternate route of ethylene receptor signaling.   
741 *Frontiers in Plant Science* **5**:1–6.
- 742 **Zhang, Z., Tateda, C., Jiang, S., Shrestha, J., Jelenska, J., Speed, D. J., and Greenberg, J.**

743 T. (2017). A Suite of Receptor-Like Kinases and a Putative Mechano-Sensitive Channel  
744 Are Involved in Autoimmunity and Plasma Membrane – Based Defenses in Arabidopsis.  
745 *Molecular Plant-Microbe interactions* **30**:150–160.

746 Zhang, Z., Tong, X., Liu, S.-Y., Chai, L.-X., Zhu, F.-F., Zhang, X.-P., Zou, J.-Z., and Wang,  
747 X.-B. (2019). Genetic analysis of a Piezo-like protein suppressing systemic movement of  
748 plant viruses in Arabidopsis thaliana. *Scientific Reports* **9**:3187.

749 Zou, Y., Chintamanani, S., He, P., Fukushige, H., Yu, L., Shao, M., Zhu, L., Hildebrand, D.  
750 F., Tang, X., and Zhou, J.-M. (2015). A gain-of-function mutation in Msl10 triggers cell  
751 death and wound-induced hyperaccumulation of JA in Arabidopsis. *Journal of Integrative*  
752 *Plant Biology* **58**:600–609.

753  
754

755 **Figure 1. *MSL10-GFP* overexpression lines, *msl10-3G* mutants, and *MSL10g*<sup>7A</sup> lines have**  
756 **similar whole-plant phenotypes. (A)** Predicted topology of an *AtMSL10* monomer. Teal,  
757 cytosolic N-terminus; yellow, transmembrane helices; green, cytosolic C-terminus. Black  
758 triangles denote the positions of the residues mutated in this study. The MscS domain is as  
759 defined in (Veley et al. 2014). **(B)** Multiple alignment of protein sequences corresponding to the  
760 N-terminus of putative *AtMSL10* orthologs in the *Brassicaceae* family. Darker teal shading  
761 indicates higher conservation score and identical amino acids with an asterisk. **(C)** Multiple  
762 alignment of protein sequences corresponding to the C-terminus of putative *AtMSL10* orthologs  
763 in selected flowering plants. Conservation of residues is indicated as in **(B)**. **(D)** and **(E)** T4  
764 homozygous lines overexpressing *MSL10-GFP* in the *Col-0* background (line 15-2), T3  
765 homozygous lines expressing *MSL10g*, or *MSL10g*<sup>7D</sup> in the *msl10-1* background, and T3  
766 segregating or T3 homozygous lines expressing *MSL10g*<sup>7A</sup> in the *msl10-1* background were  
767 selected for comparison. **(D)** Whole-plant images of 25-day-old plants of the indicated genotypes  
768 grown side-by-side at 21°C under a 24-h light regime. Bar = 0.5 cm. **(E)** Petiole length of the  
769 fourth or fifth leaf from 28-day-old plants. Different letters indicate significant differences as  
770 determined by one-way ANOVA followed by Tukey’s post-hoc test (P < 0.05). Error bars  
771 indicate ± SD of three replicates (n = 18 per replicate).

772

773 **Figure 2. *MSL10-GFP* overexpression lines, *msl10-3G* mutants, and *MSL10g*<sup>7A</sup> lines display**  
774 **similar expression profiles.** Quantitative RT-PCR analysis of four genes previously shown to be  
775 upregulated in *35S:MSL10-GFP* overexpression lines (A) and four genes previously shown to be  
776 upregulated in the *msl10-3G* background (B). cDNA was synthesized from total RNA extracted  
777 from rosette leaves of three-week-old plants grown at 21°C under 24 hours of light. Expression  
778 levels of respective genes were normalized to both *EF1α* and *UBQ5*. Mean fold-change values  
779 relative to the wild type are plotted, with error bars showing ± SE of the mean of three biological  
780 replicates. Different letters indicate significant difference as determined by one-way ANOVA  
781 followed by Tukey's post-hoc test ( $P < 0.05$ ). For transgenics, two independent T3 or T4  
782 homozygous lines were selected for comparison.

783  
784 **Figure 3. Phospho-mimetic substitutions in the *MSL10* N-terminus suppress phenotypes**  
785 **associated with overexpression of *MSL10*<sup>S640L</sup>.** (A) **Top row:** Images of three-week-old plants  
786 grown at 21°C overexpressing wild-type *MSL10-GFP*, phospho-mimetic *MSL10*<sup>7D</sup>-*GFP*,  
787 *MSL10*<sup>S640L</sup>-*GFP*, or *MSL10*<sup>7D,S640L</sup>-*GFP*. Overexpression lines were generated in the *msl9-*  
788 *1;msl10-1* background, phenotypically indistinguishable from *msl10-1*. Two independent  
789 homozygous T3 lines for each transgene are shown. Bar = 0.5 cm. **Middle row:** Trypan blue  
790 staining of four-week old leaves from the above T3 plants to visualize ectopic cell death. **Bottom**  
791 **row:** DAB staining of five-week-old leaves to detect the accumulation of H<sub>2</sub>O<sub>2</sub>. For leaf images,  
792 bar = 0.2 mm. (B) Immunoblot analysis of *MSL10-GFP* variants in rosette leaves of two-week  
793 old plants. *MSL10-GFP* was detected with an anti-GFP primary antibody (top), and then the blot  
794 was stripped and re-probed with an anti-α-tubulin primary antibody (bottom). Expected protein  
795 sizes are indicated at the left according to a commercially available standard. The two forms of  
796 *MSL10-GFP* that migrate slower on SDS-PAGE may result from posttranslational modifications.

797  
798 **Figure 4. The soluble N- and C- termini of *MSL10* interact in the split ubiquitin yeast two**  
799 **hybrid.** (A) Specific interactions between the N- and C-termini of *MSL10* do not require TM  
800 helices and are unaffected by the S640L lesion. (B) Phospho-mimic or phospho-dead lesions in  
801 the N-terminus do not affect interactions with the soluble C-terminus. Left and middle panels  
802 indicate fusions with the C- and N-terminal domains of ubiquitin (Cub and Nub, respectively).  
803 Teal, cytosolic N-terminus; yellow, transmembrane helices; green, cytosolic C-terminus.



804 Asterisks and open arrows indicate the S640L lesion. Right panel, results from liquid assay for  
805 B-galactosidase activity. Data presented are means  $\pm$  SD of three replicates. Different letters  
806 indicate significant differences as determined by one-way ANOVA followed by Tukey's post-  
807 hoc test ( $P < 0.05$ ).

808

809 **Figure 5. The soluble N- and C- termini of MSL10 interact in the bi-molecular**  
810 **fluorescence complementation (BiFC) assay.** Confocal laser scanning micrographs of the  
811 abaxial surface of *N. benthamiana* leaves 3 to 5 days after infiltration with *Agrobacterium*  
812 harboring the indicated BiFC construct pairs. Scale bar, 50  $\mu$ m. Identical acquisition settings  
813 were used in all images. All experiments were repeated at least three times. MSL10\* indicates  
814 MSL10<sup>S640L</sup>.

815

816 **Figure 6. A three-step model for the regulation of MSL10's cell death signaling function**

817 For simplicity, only the soluble N- and C-terminal domains of MSL10 are shown. They could be  
818 from the same or from different monomers. The inactive N-terminus, active N-terminus, and C-  
819 terminus are represented by rectangles colored blue, red, and green, respectively. Proposed  
820 conformational changes are indicated by changes in the shape of each rectangle. This model  
821 explains the signaling output (red arrow) observed in wild type plants (**A**), in response to  
822 MSL10-GFP overexpression (**B**), in the presence of MSL10 phospho-variants (**C**), in the  
823 presence of alleles or transgenes harboring the S640L mutation in the C-terminus (**D**, top), or in  
824 the presence of a transgene that combines S640L with phospho-mimetic substitutions in the N-  
825 terminus (**D**, bottom). See main text for more detailed explanations of each scenario.

## FIGURE S1

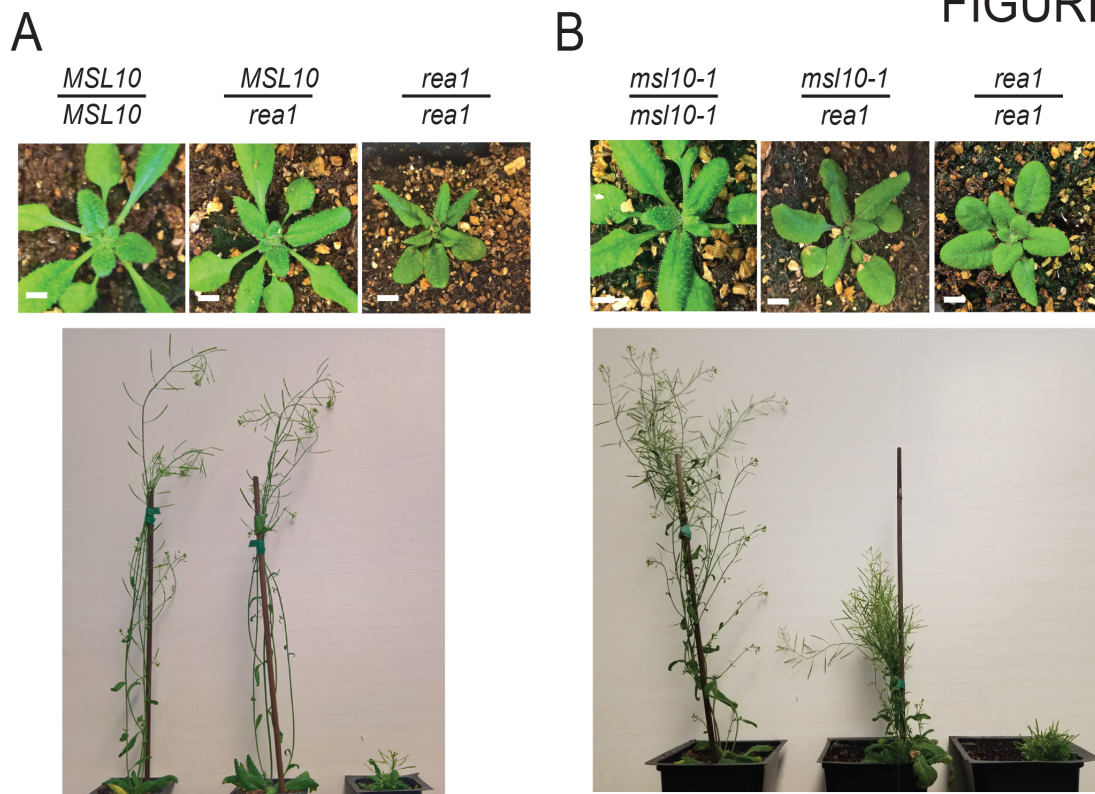

### C

| Type of F2 crosses                                         | No. of plants phenotyped | Expected     | Observed       | Phenotypes                                                                                               | Seggregation analysis                                           |
|------------------------------------------------------------|--------------------------|--------------|----------------|----------------------------------------------------------------------------------------------------------|-----------------------------------------------------------------|
| $\frac{MSL10}{msl10-3G} \times \frac{MSL10}{msl10-3G}$     | 83                       | 62.25:20.75  | 66:17          | 66 plants appear wild type; 17 plants exhibit <i>msl10-3G</i> like phenotype                             | df = 1, $\chi^2 = 0.906$ , $\chi^2$ Critical = 3.84 at p < 0.05 |
| $\frac{msl10-1}{msl10-3G} \times \frac{msl10-1}{msl10-3G}$ | 162                      | 40.5:81:40.5 | 40.5:72.9:48.6 | 40 plants appear wild type; 72 plants are of intermediate height; 50 plants exhibit <i>msl10-3G</i> like | df = 2, $\chi^2 = 3.72$ , $\chi^2$ Critical = 7.81 at p < 0.05  |

### Supplemental Figure 1. *msl10-3G* is a recessive gain-of-function allele.

(A) Representative images of parental and F1 offspring plants from a *msl10-3G* backcross to wild type *Col-0*. Top, four-week-old; bottom, eight-week-old plants. Bar = 0.5 cm.

(B) Representative images of parental and F1 offspring from a *msl10-3G* outcross to *msl10-1*. Top, four-week-old plants; bottom, twelve-week-old plants. Bar = 0.5 cm.

(C) Table showing segregation of *msl10-3G* inheritance data compared to the expected ratios using a chi-squared analysis. Plants were randomly chosen for genotyping.



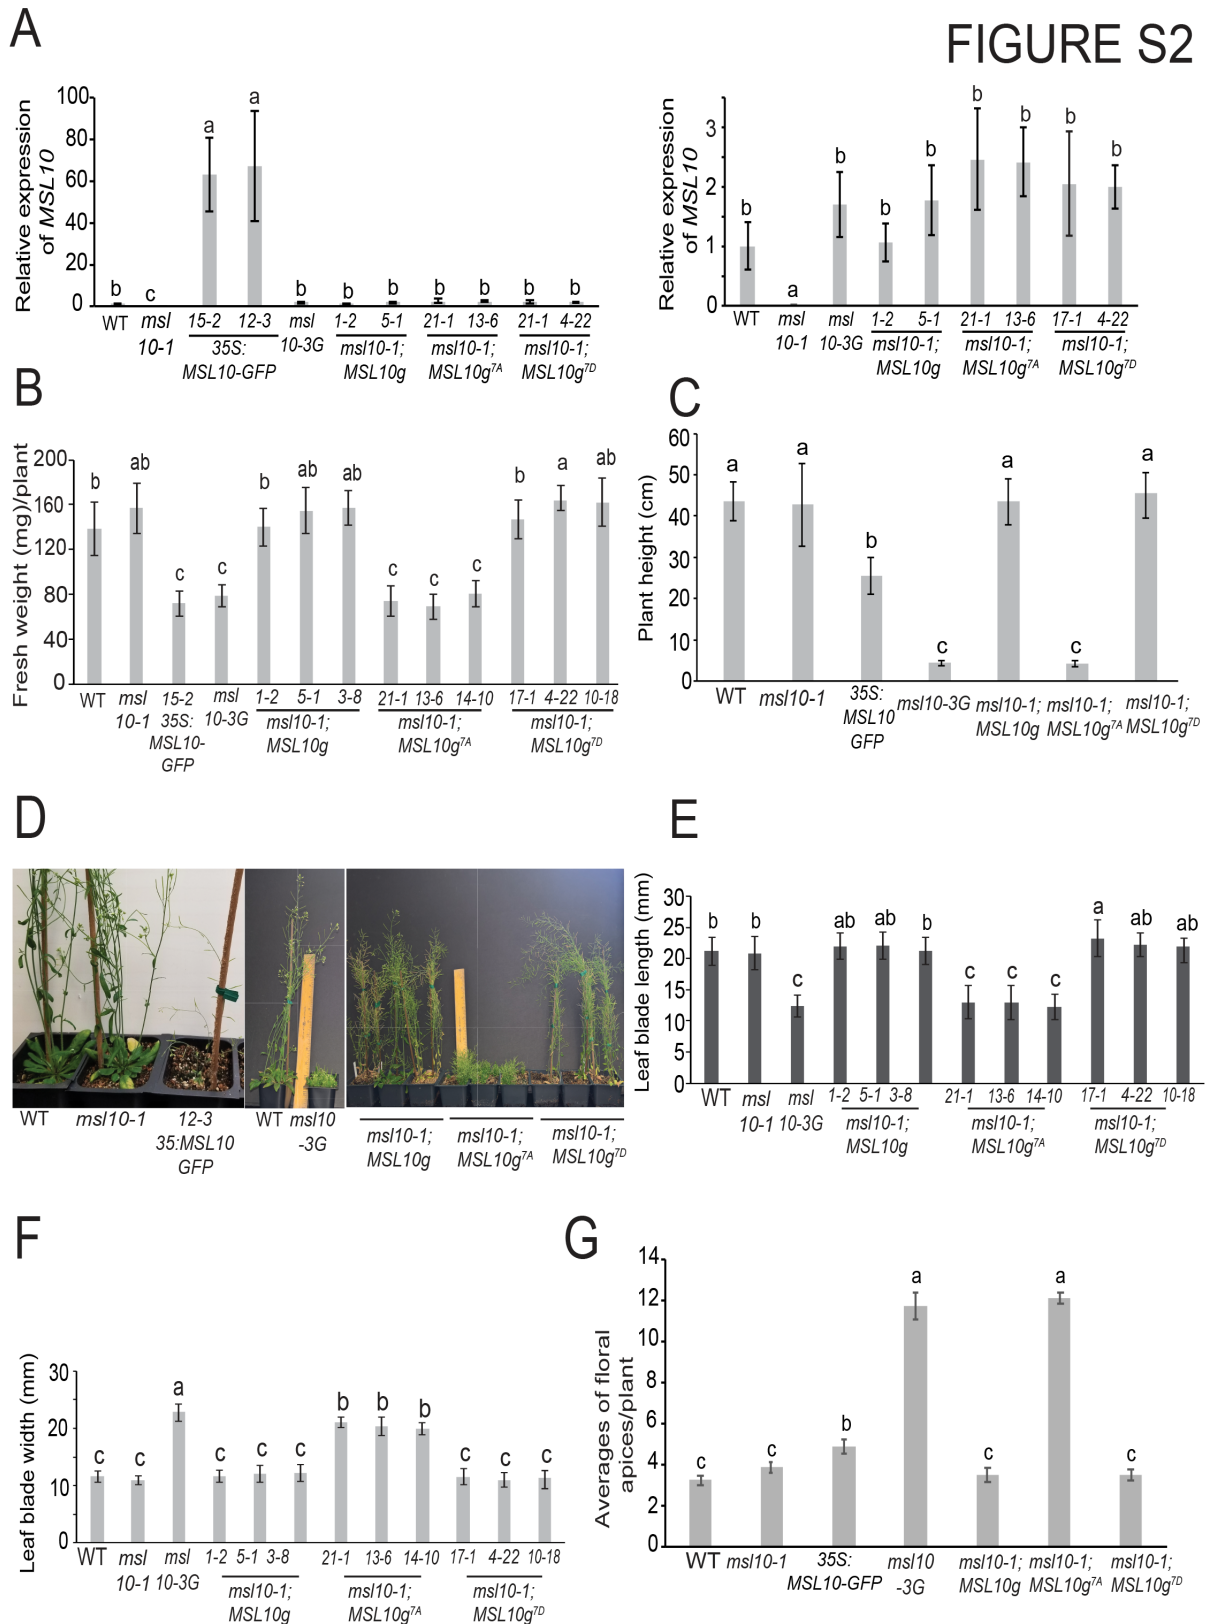

**Supplemental Figure 2. *msl10-3G* allele and *MSL10g<sup>7A</sup>* transgene exhibit similar reduction in fresh weight, petiole length, plant height and apical dominance to *35S:MSL10-GFP***

(A) Relative transcript abundance of *MSL10* in the indicated lines. Left panel displays accumulation of *MSL10* transcripts in plants harboring the *35S:MSL10-GFP* transgene,

genomic *MSL10g* phospho-variants, the EMS-induced point mutant allele *msl10-3G* or the null mutant allele *msl10-1* compared to wild-type *Col-0*. Right panel depicts *MSL10* expression only in wild type, null mutant allele and genomic *MSL10g* phospho-variants. cDNA was synthesized from total RNA extracted from rosette leaves of three-week-old plants. Expression levels of respective genes were analyzed with qRT-PCR and normalized to both *EF1 $\alpha$*  and *UBQ5*. Mean fold-change values relative to the wild type are plotted, with error bars showing  $\pm$ SE of the mean of three biological replicates.

**(B)** Average fresh weight of rosettes clipped from three-week-old plants of the indicated genotypes. Error bars indicate  $\pm$ SD of three replicates (n=10 per replicate).

**(C)** Plant height measurement from eight-week-old plants from indicated genotypes. Error bars indicate  $\pm$ SD of three replicates (n=20-30 per replicate). Different letters indicate significant difference as determined by one-way ANOVA followed by Scheffe's post-hoc test ( $P < 0.05$ ) for unbalanced samples.

**(D)** Representative images of eight-week-old adult plants from indicated genotypes.

**(E)** Leaf blade length of seventh leaf from 35-day-old plants from the indicated genotypes. Error bars indicate  $\pm$ SD of three replicates (n=18 per replicate).

**(F)** Leaf blade width of fourth or fifth leaf from 35-day-old plants from the indicated genotypes. Error bars indicate  $\pm$ SD of three replicates (n=18 per replicate).

**(G)** Average number of floral apices were counted from six to seven-week-old plants of the indicated genotypes. Error bars indicate  $\pm$ SD of three replicates (n=20 per replicate).

The T4 homozygous transgenic lines expressing either *35S:MSL10-GFP* in *Col-0* background (*15-2*) and T3 homozygous transgenic lines expressing *MSL10g*, or *MSL10g<sup>7D</sup>* in the *msl10-1* background, and T3 segregating or T3 homozygous lines for *MSL10g<sup>7A</sup>* were selected for comparison. Plants of indicated genotypes were grown side-by-side in soil at 21°C under a 24-h light regime. Different letters indicate significant differences, as determined by one-way ANOVA followed by Tukey's post-hoc test ( $P < 0.05$ ).

## FIGURE S3

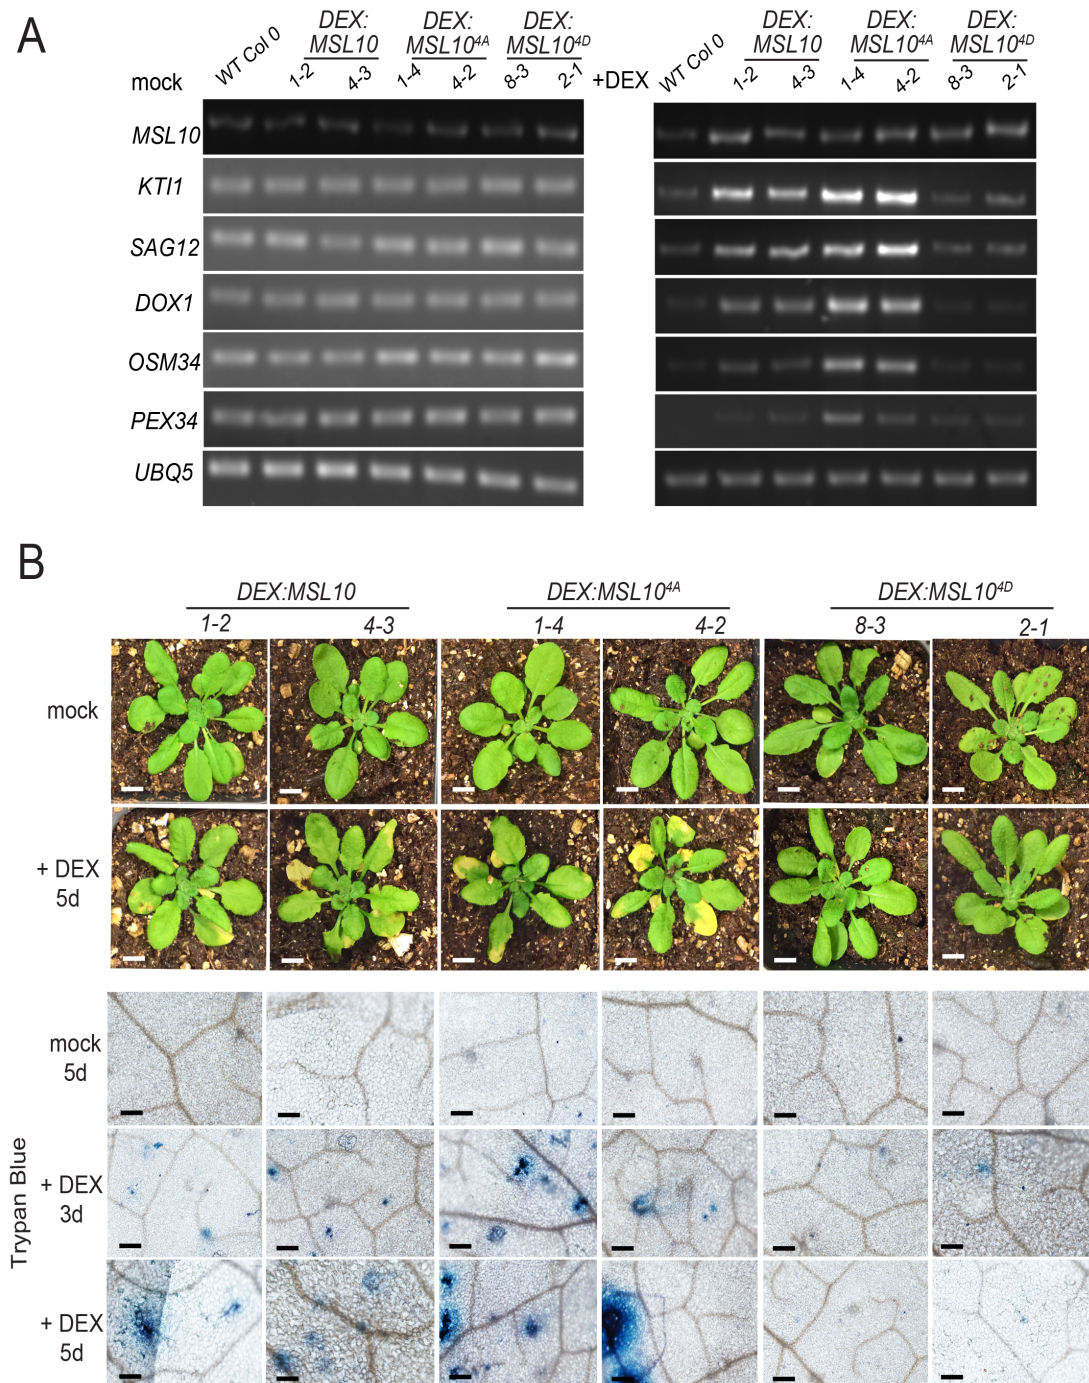

### Supplemental Figure 3. DEX-inducible overexpression of *MSL10* and *MSL10<sup>4A</sup>* promotes the upregulation of *MSL10*-associated marker genes and ectopic cell death

Representative images of five-week old plants grown under a short-day photoperiod (10 h light/14 h dark) sprayed with 0.016% ethanol (mock; top row) or 30  $\mu$ M DEX (bottom row) for 5 days. Expression profiles of five marker genes before and after DEX treatment of transgenic plants expressing *DEX:MSL10* and its phospho-variants using semi-quantitative RT-PCR. Rosette leaves from five-week-old plants were infiltrated with 10  $\mu$ M DEX or mock (0.016% ethanol), and tissue was harvested 12 h post infiltration. Total RNA was isolated from

*Col-0*, and from two independent homozygous T3 lines expressing either *DEX:MSL10*, *DEX:MSL10<sup>4A</sup>* or *DEX:MSL10<sup>4D</sup>*. Expression of *UBQ5* was used as a control.

## FIGURE S4

**A**

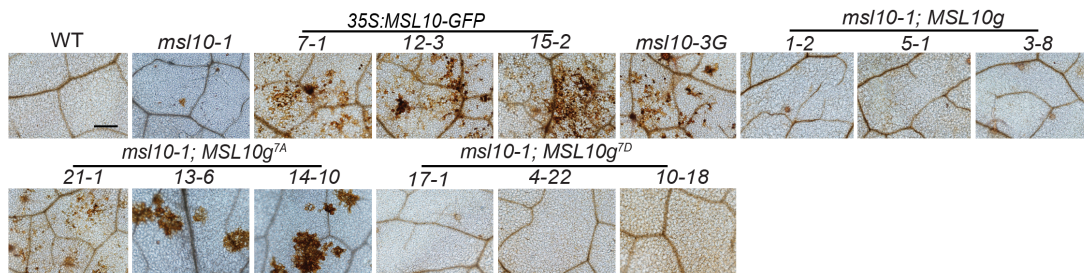

**B**

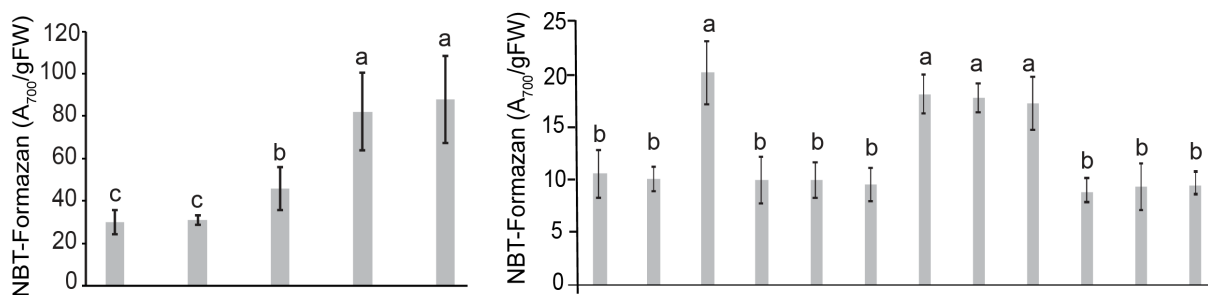

**C**

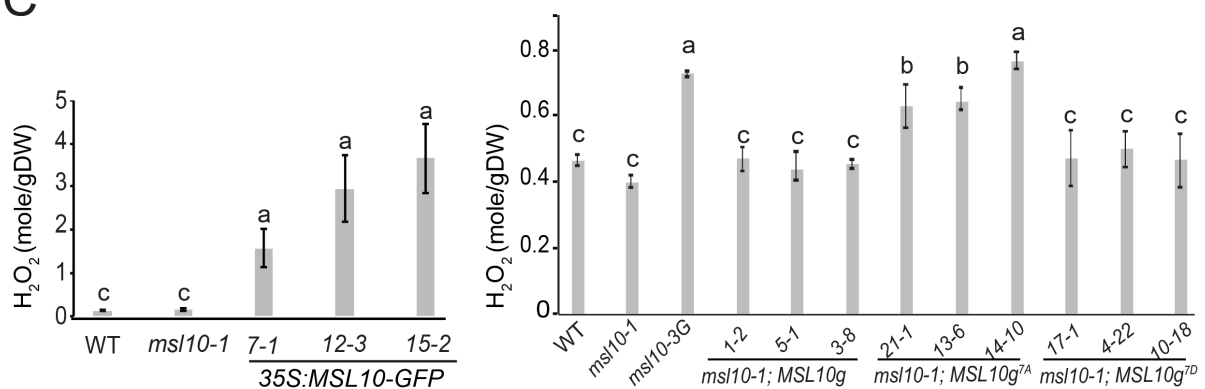

**Supplemental Figure 4. Accumulation of ROS associated with expression of 35S:MSL10-GFP, MSL10g<sup>7A</sup> transgene and *msl10-3G* allele.**

(A) Elevated levels of H<sub>2</sub>O<sub>2</sub> detected by DAB staining. Representative bright-field images of rosette leaves are shown. Bar = 200 μm.

(B) Colorimetric quantification of NBT-formazan deposition on rosette leaves. FW, fresh weight. Data are means ± SD of three replicates (n=18).



**(C)** Hydrogen peroxide (H<sub>2</sub>O<sub>2</sub>) content, quantified as the H<sub>2</sub>O<sub>2</sub> (mmol) per gram dry weight (DW) of rosette leaves using Amplex Red-coupled fluorescence quantitative assay. Values are means ± SD of three replicates (n=14).

**(A), (B), and (C)** Leaves from three-week-old plants from each line grown at 21°C (top row) under 24-h light regime were used for the experiment. Three independent T3 homozygous transgenic lines expressing *MSL10g*, *MSL10g*<sup>7A</sup> or *MSL10g*<sup>7D</sup> in the *msl10-1* background were selected for comparison.

## FIGURE S5

A

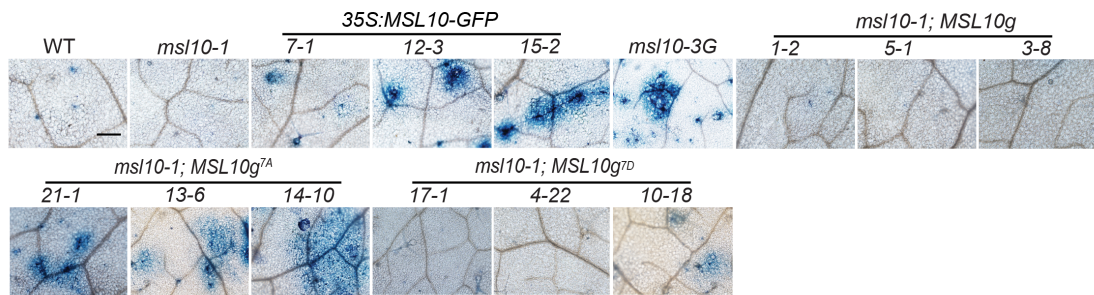

B

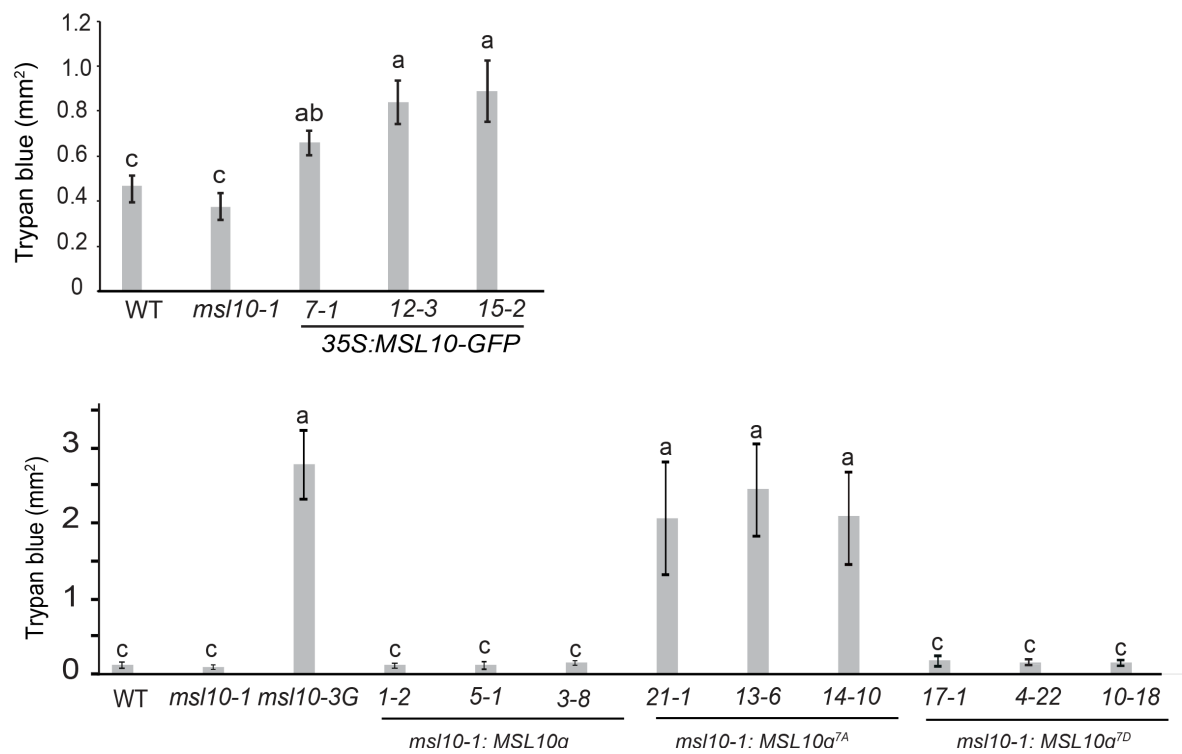

### Supplemental Figure 5. Incidence of ectopic cell death associated with expression of *35S:MSL10-GFP*, *MSL10g<sup>7A</sup>* transgene and *msl10-3G* allele.

(A) Visualization of ectopic cell death incidence by Trypan blue staining. Bar = 200  $\mu$ m.

(B) Quantification of ectopic cell death detected by Trypan blue staining. Data are means  $\pm$  SD of three replicates each one consisting of 7 to 10 leaves.

(A) and (B) Leaves from three-week-old plants from each line grown at 21°C (top row) under 24-h light regime were used for the experiment. Three independent T3 homozygous transgenic lines expressing *MSL10g*, *MSL10g<sup>7A</sup>* or *MSL10g<sup>7D</sup>* in the *msl10-1* background were selected for comparison.

## FIGURE S6

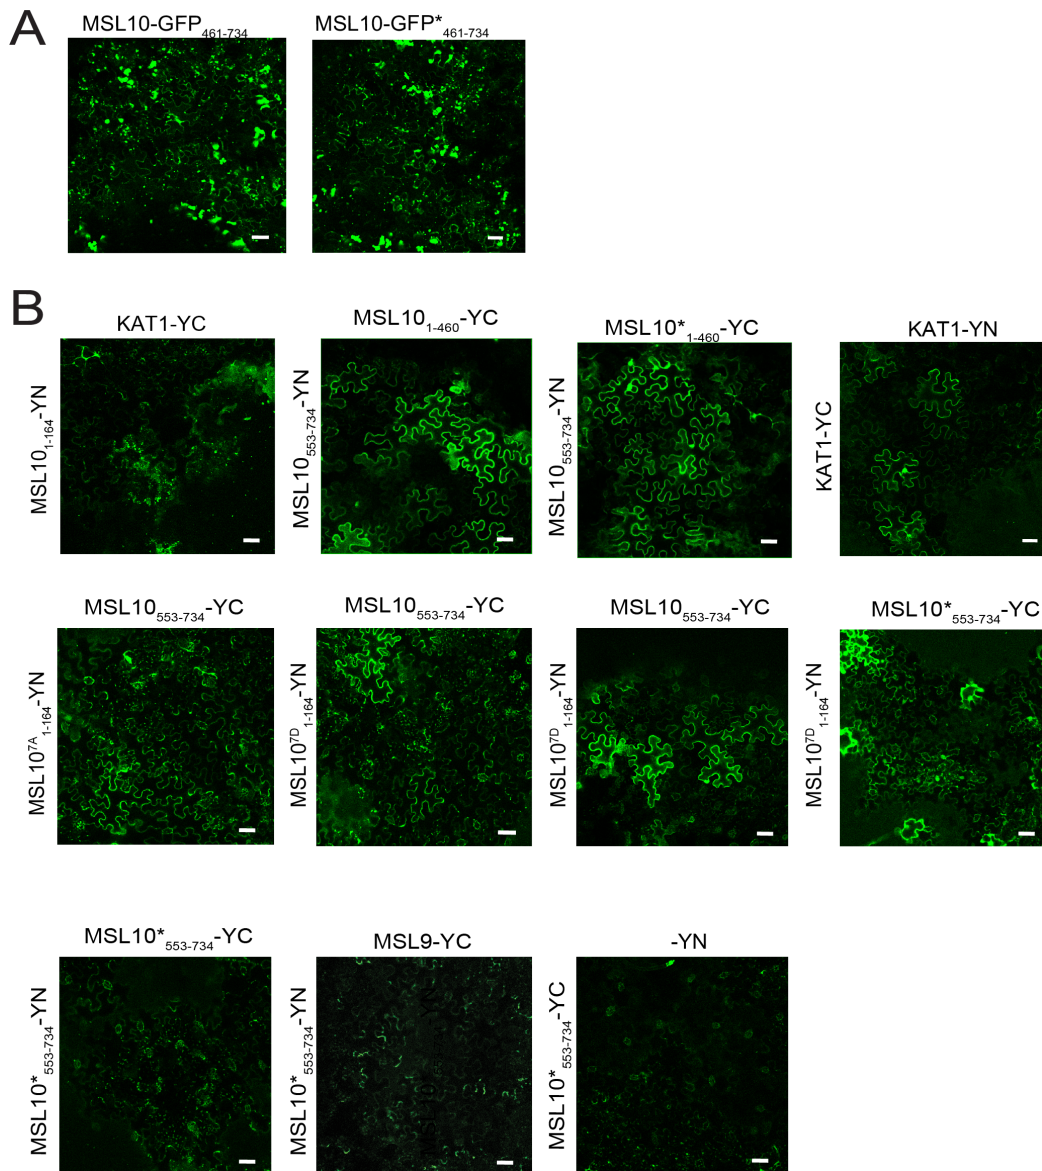

### Supplemental Figure 6. Additional controls for the BiFC assay.

(A) *N. benthamiana* leaves co-infiltrated with constructs fused to the split YFP were observed under the confocal microscope 3-5 days after infiltration. Scale bar, 50 μm. (Top row) Neither domain interacts with KAT1. (Middle row) Neither phosphorylation status of the N-terminus nor the S640L lesion in the C-terminus affect the interaction. either reconstituted YFP fluorescence signal from positive interaction or marked reduction in YFP signal in case of negative interaction from indicated combinations. (Bottom row) Negative controls for the N-terminus with the S640L lesion. Scale bar, 50 μm.

**(B)** The C-terminal half of MSL10 forms aggregates when fused to GFP. Representative confocal images of abaxial *N. benthamiana* leaf epidermis from plants transiently expressing truncated MSL10<sub>461-734</sub>-GFP and MSL10<sup>S640L</sup><sub>461-734</sub>-GFP. Images were taken 5 d post-infiltration. Scale bar, 50  $\mu$ m.

**Supplemental Table 1.** List of primers used in this study.

| Cloning DEX:MSL10 and its variants                                                                      |                                  |
|---------------------------------------------------------------------------------------------------------|----------------------------------|
| Name                                                                                                    | Primer 5'-3'                     |
| XbaI-C_YFP gateway-F                                                                                    | GCTCTAGACATTTGGAGAGGACACG        |
| EcoRV-C_YFP gateway-R                                                                                   | GGATATCATTAAGCAGGACTCTAGGGAC     |
| RT-PCR                                                                                                  |                                  |
| <i>SAG12</i> F                                                                                          | CCACTCGACAATGAACTCAT             |
| <i>SAG12</i> R                                                                                          | TGACTCAGTTGTCAAGCC               |
| <i>DOX1</i> F                                                                                           | ATCGGTTTCTTCTTCTTATCGTG          |
| <i>DOX1</i> R                                                                                           | TTTGATTTCTGATCGACGGGG            |
| <i>PERX34</i> F                                                                                         | CAACATCGTCCACTTGGACAATCTT        |
| <i>PERX34</i> R                                                                                         | CCTGCCAAAGTGACAGATTGTTGAG        |
| <i>KTII</i> F                                                                                           | CCCGAATCACAGAACCCTCAA            |
| <i>KTII</i> R                                                                                           | GAACATAACCAAGAACGGCTTATC         |
| <i>OSM34</i> F                                                                                          | CTGAGTACGCTTTGAACCAATTC          |
| <i>OSM34</i> R                                                                                          | TCTCCTCGGTGACCATCTT              |
| <i>MSL10</i> F                                                                                          | AGAGGTTGATCTTGTGTTCCC            |
| <i>MSL10</i> R                                                                                          | TTTGTGTCGTTTAAGGAATGCG           |
| <i>UBQ5</i> F                                                                                           | TCTCCGTGGTGGTGCTAAG              |
| <i>UBQ5</i> R                                                                                           | GAACCTTCCAGATCCATCG              |
| <i>EF1alpha</i> F                                                                                       | ACAGGCGTTCTGGTAAGGAG             |
| <i>EF1alpha</i> R                                                                                       | CCTTCTTCACTGCAGCCTTG             |
| <i>MSL10</i> F                                                                                          | GTTGGTTTCTGGGTTTAAGCC            |
| <i>MSL10</i> R                                                                                          | TACTTGGAGTAACCGGTGCTG            |
| <i>LOX2</i> F                                                                                           | CAAGGATAAGAATGCCAACGGAAGATCC     |
| <i>LOX2</i> R                                                                                           | GGTGTTACCGGAATGGGTGTTCC          |
| <i>PDF1.2</i> F                                                                                         | ATGGCTAAGTTTGCTTCCATCATCACCC     |
| <i>PDF1.2</i> R                                                                                         | CATGGGACGTAACAGATACTTGTGTGCT     |
| <i>AOS</i> F                                                                                            | TTTGAGGCATGTGTTGTGGT             |
| <i>AOS</i> R                                                                                            | AGCTCCGTTAATTTCTCGTCGTTAAGG      |
| <i>RAP2.6</i> F                                                                                         | GATTACCGGTTTACAGCTGTGACTAAAG     |
| <i>RAP2.6</i> R                                                                                         | ACCAAAGAGGAGTAATTGTATTGATCATATTC |
| Genotyping ( <i>msl10-1</i> ) lines                                                                     |                                  |
| <i>MSL10</i> F                                                                                          | GTTGGTTTCTGGGTTTAAGCC            |
| <i>MSL10</i> R                                                                                          | TACTTGGAGTAACCGGTGCTG            |
| T-DNA primer (Lb1.3)                                                                                    | ATTTTGCCGATTTTCGGAAC             |
| Genotyping <i>MSL10<sup>S640L</sup></i> ( <i>msl10-3G</i> ) lines                                       |                                  |
| 12080F6                                                                                                 | GCAACGACTAAGGTTTTGCTG            |
| 78610R1                                                                                                 | GCTAGAGCTTCTCTGAATCGGAG          |
| Genotyping <i>MSL10g<sup>WT</sup></i> , <i>MSL10g<sup>7A</sup></i> and <i>MSL10g<sup>7D</sup></i> lines |                                  |
| 623 F                                                                                                   | ATGGCAGAACAAAAGAGTAGTAACG        |
| 1894 R                                                                                                  | TATCTTACTGCGCATCTCTCTGTTTACGC    |
| 3754 R                                                                                                  | TAAAGTAGACCACTTTAGATCAGAACC      |
| Cloning <i>MSL10g</i>                                                                                   |                                  |
| Gibson pair F2 linearization                                                                            | CACCCTTGGCACGTGTGAAGTAAGT        |
| Gibson pair R2 linearization                                                                            | TCTTGGAAGATCCGAAAGCGT            |



|                                                             |                                             |
|-------------------------------------------------------------|---------------------------------------------|
| Gibson pair F3                                              | CACCGGAGGGAGATTTGATGCAGAA                   |
| Gibson pair R3                                              | TCGATGTTGATGCCCATGAC                        |
| Adding 7A/7D at the N terminus to MSL10g                    |                                             |
| Gibson pair 10gF1 linearization                             | GAGGAGGAGGAGATGTTGTTATC                     |
| Gibson pair 10gR1 linearization                             | GATAACAACATCTCCTCCTCCTC                     |
| Amplifying insert F1                                        | ATAAGATGAAGCGGGAGAAAGT                      |
| Amplifying insert R1                                        | ACTTTCTCCCGCTTCATCTTAT                      |
| Split Ubiquitin yeast two hybrid                            |                                             |
| attBF1                                                      | ACAAGTTTGTACAAAAAAGCAGGCTCTCCAACC<br>ACCATG |
| attBR1                                                      | TCCGCCACCACCAACCACTTTGTACAAGAAAGC<br>TGGGTA |
| MSL10 5 <sup>th</sup> and 6 <sup>th</sup> TM F/S640L lesion | CACCATGCGGGAGAATTACAAGAAAAGCTTTCA<br>CAG    |
| MSL10 5 <sup>th</sup> and 6 <sup>th</sup> TM R              | GCTAGAGCTTCTCTGAATCGGAG                     |
| MSL10 4TM F/7A/7D                                           | CACCATGGCAGAACAAAAGAGTAGTAACG               |
| MSL10 4TM R/7A/7D                                           | GTCTCAGCGGCACCATCAAA                        |
| Soluble C term F/S640L lesion                               | CACCATGCTCTTTGAATCCATTGTGTTTCG              |
